# Supplementary material for: Polymerization of 1-chloro-2-phenylacetylene derivatives by using a Brookhart-type catalyst
Source: Royal Society of Chemistry journal article supplement (doi:10.1039/c9py00974d), 2019-01-01
Supplement: c9py00974d1.pdf [file c9py00974d1.pdf]

Electronic Supporting Information for

## Polymerization of 1-chloro-2-phenylacetylene derivatives by using Brookhart-type catalyst

Fulin Yang,<sup>a</sup> Shuangjie Zhang,<sup>a</sup> Tanxiao Shen,<sup>a</sup> Juechen Ni,<sup>a</sup> Jie Zhang,<sup>a</sup> Xiao Cheng,<sup>a</sup> Jing Zhi Sun,<sup>\*a</sup>  
Zhisheng Fu,<sup>\*a</sup> Ben Zhong Tang<sup>\*a,b,c</sup>

<sup>a</sup> MOE Key Laboratory of Macromolecules Synthesis of Functionalization, Department of Polymer Science and Engineering, Zhejiang University, Hangzhou 310027, China.

<sup>b</sup> State Key Laboratory of Luminescent Materials and Devices, Center for Aggregation-Induced Emission, South China University of Technology, Guangzhou 510640, China.

<sup>c</sup> Department of Chemistry, Hong Kong Branch of Chinese National Engineering Research Center for Tissue Restoration and Reconstruction, The Hong Kong University of Science & Technology, Clear Water Bay, Kowloon, Hong Kong, China.

### Table of Contents

|                                                                                  |     |
|----------------------------------------------------------------------------------|-----|
| <b>Scheme S1.</b> Synthetic route to 1-chloro-2-phenylacetylene derivatives..... | S3  |
| <b>Scheme S2.</b> Synthetic route to $\alpha$ -diimine ligand.....               | S3  |
| <b>Scheme S3.</b> Synthetic route to ( $\alpha$ -diimine)PdMeCl complex.....     | S3  |
| <b>Figure S1.</b> <sup>1</sup> H NMR spectrum of M1 in CDCl <sub>3</sub> .....   | S4  |
| <b>Figure S2.</b> <sup>13</sup> C NMR spectrum of M1 in CDCl <sub>3</sub> .....  | S4  |
| <b>Figure S3.</b> High resolution mass spectrum of M1.....                       | S5  |
| <b>Figure S4.</b> <sup>1</sup> H NMR spectrum of M2 in CDCl <sub>3</sub> .....   | S5  |
| <b>Figure S5.</b> <sup>13</sup> C NMR spectrum of M2 in CDCl <sub>3</sub> .....  | S6  |
| <b>Figure S6.</b> High resolution mass spectrum of M2.....                       | S6  |
| <b>Figure S7.</b> <sup>1</sup> H NMR spectrum of M3 in CDCl <sub>3</sub> .....   | S7  |
| <b>Figure S8.</b> <sup>13</sup> C NMR spectrum of M3 in CDCl <sub>3</sub> .....  | S7  |
| <b>Figure S9.</b> High resolution mass spectrum of M3.....                       | S8  |
| <b>Figure S10.</b> <sup>1</sup> H NMR spectrum of M4 in CDCl <sub>3</sub> .....  | S8  |
| <b>Figure S11.</b> <sup>13</sup> C NMR spectrum of M4 in CDCl <sub>3</sub> ..... | S9  |
| <b>Figure S12.</b> High resolution mass spectrum of M4.....                      | S9  |
| <b>Figure S13.</b> <sup>1</sup> H NMR spectrum of M5 in CDCl <sub>3</sub> .....  | S10 |
| <b>Figure S14.</b> <sup>13</sup> C NMR spectrum of M5 in CDCl <sub>3</sub> ..... | S11 |
| <b>Figure S15.</b> High resolution mass spectrum of M5.....                      | S11 |
| <b>Figure S16.</b> <sup>1</sup> H NMR spectrum of M6 in CDCl <sub>3</sub> .....  | S11 |
| <b>Figure S17.</b> <sup>13</sup> C NMR spectrum of M6 in CDCl <sub>3</sub> ..... | S12 |
| <b>Figure S18.</b> High resolution mass spectrum of M6.....                      | S12 |
| <b>Figure S19.</b> <sup>1</sup> H NMR spectrum of M7 in CDCl <sub>3</sub> .....  | S13 |
| <b>Figure S20.</b> <sup>13</sup> C NMR spectrum of M7 in CDCl <sub>3</sub> ..... | S13 |
| <b>Figure S21.</b> High resolution mass spectrum of M7.....                      | S14 |

---

|                                                                                                                                     |     |
|-------------------------------------------------------------------------------------------------------------------------------------|-----|
| <b>Figure S22.</b> $^1\text{H}$ NMR spectrum of <b>M8</b> in $\text{CDCl}_3$ .....                                                  | S14 |
| <b>Figure S23.</b> $^{13}\text{C}$ NMR spectrum of <b>M8</b> in $\text{CDCl}_3$ .....                                               | S15 |
| <b>Figure S24.</b> High resolution mass spectrum of <b>M8</b> .....                                                                 | S15 |
| <b>Figure S25.</b> $^1\text{H}$ NMR spectrum of <b>M9</b> in $\text{DMSO-}d_6$ .....                                                | S16 |
| <b>Figure S26.</b> $^{13}\text{C}$ NMR spectrum of <b>M9</b> in $\text{DMSO-}d_6$ .....                                             | S16 |
| <b>Figure S27.</b> High resolution mass spectrum of <b>M9</b> .....                                                                 | S17 |
| <b>Figure S28.</b> $^1\text{H}$ NMR spectrum of <b>M10</b> in $\text{CDCl}_3$ .....                                                 | S17 |
| <b>Figure S29.</b> $^{13}\text{C}$ NMR spectrum of <b>M10</b> in $\text{CDCl}_3$ .....                                              | S18 |
| <b>Figure S30.</b> $^1\text{H}$ NMR spectrum of <b>M11</b> in $\text{CDCl}_3$ .....                                                 | S18 |
| <b>Figure S31.</b> $^{13}\text{C}$ NMR spectrum of <b>M11</b> in $\text{CDCl}_3$ .....                                              | S19 |
| <b>Figure S32.</b> $^1\text{H}$ NMR spectrum of $\alpha$ -diimine ligand in $\text{CDCl}_3$ .....                                   | S19 |
| <b>Figure S33.</b> $^{13}\text{C}$ NMR spectrum of $\alpha$ -diimine ligand in $\text{CDCl}_3$ .....                                | S20 |
| <b>Figure S34.</b> $^1\text{H}$ NMR spectrum of $(\alpha\text{-diimine})\text{PdMeClO}$ complex in $\text{CD}_2\text{Cl}_2$ .....   | S20 |
| <b>Figure S35.</b> $^{13}\text{C}$ NMR spectrum of $(\alpha\text{-diimine})\text{PdMeCl}$ complex in $\text{CD}_2\text{Cl}_2$ ..... | S21 |
| <b>Figure S36.</b> $^1\text{H}$ NMR spectrum of <b>P1(Ag)</b> in $\text{CDCl}_3$ .....                                              | S21 |
| <b>Figure S37.</b> $^1\text{H}$ NMR spectrum of <b>P2(Ag)</b> in $\text{CDCl}_3$ .....                                              | S22 |
| <b>Figure S38.</b> $^1\text{H}$ NMR spectrum of <b>P3(Ag)</b> in $\text{CDCl}_3$ .....                                              | S22 |
| <b>Figure S39.</b> $^1\text{H}$ NMR spectrum of <b>P4(Ag)</b> in $\text{DMSO-}d_6$ .....                                            | S23 |
| <b>Figure S40.</b> $^1\text{H}$ NMR spectrum of <b>P5(Ag)</b> in $\text{CDCl}_3$ .....                                              | S23 |
| <b>Figure S41.</b> $^1\text{H}$ NMR spectrum of <b>P6(Ag)</b> in $\text{CDCl}_3$ .....                                              | S24 |
| <b>Figure S42.</b> $^1\text{H}$ NMR spectrum of <b>P8(Ag)</b> in $(\text{THF-}d_8)$ .....                                           | S24 |
| <b>Figure S43.</b> FTIR spectra of <b>M1</b> and <b>P1(Ag)</b> .....                                                                | S25 |
| <b>Figure S44.</b> FTIR spectra of <b>M2</b> and <b>P2(Ag)</b> .....                                                                | S25 |
| <b>Figure S45.</b> FTIR spectra of <b>M3</b> and <b>P3(Ag)</b> .....                                                                | S26 |
| <b>Figure S46.</b> FTIR spectra of <b>M4</b> and <b>P4(Ag)</b> .....                                                                | S26 |
| <b>Figure S47.</b> FTIR spectra of <b>M5</b> and <b>P5(Ag)</b> .....                                                                | S27 |
| <b>Figure S48.</b> FTIR spectra of <b>M6</b> and <b>P6(Ag)</b> .....                                                                | S27 |
| <b>Figure S49.</b> FTIR spectra of <b>M8</b> and <b>P8(Ag)</b> .....                                                                | S28 |

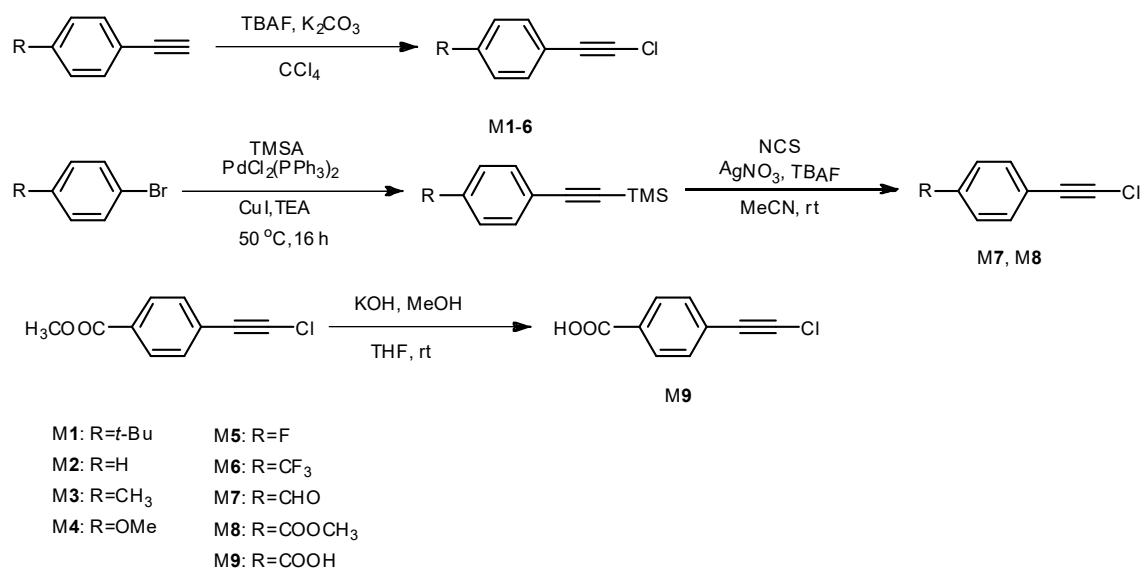

**Scheme S1.** Synthetic route to 1-chloro-2-[(para-substituted)-phenyl] acetylene monomers.

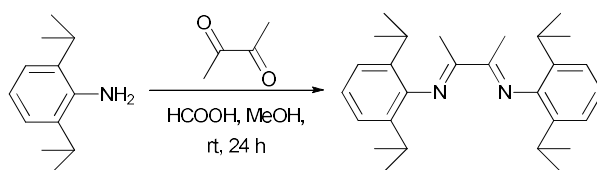

**Scheme S2.** Synthetic route to  $\alpha$ -diimine ligand.

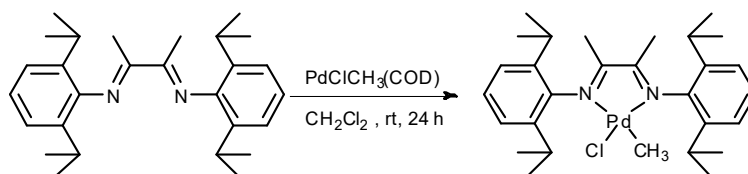

**Scheme S3.** Synthetic route to ( $\alpha$ -diimine)PdMeCl complex.

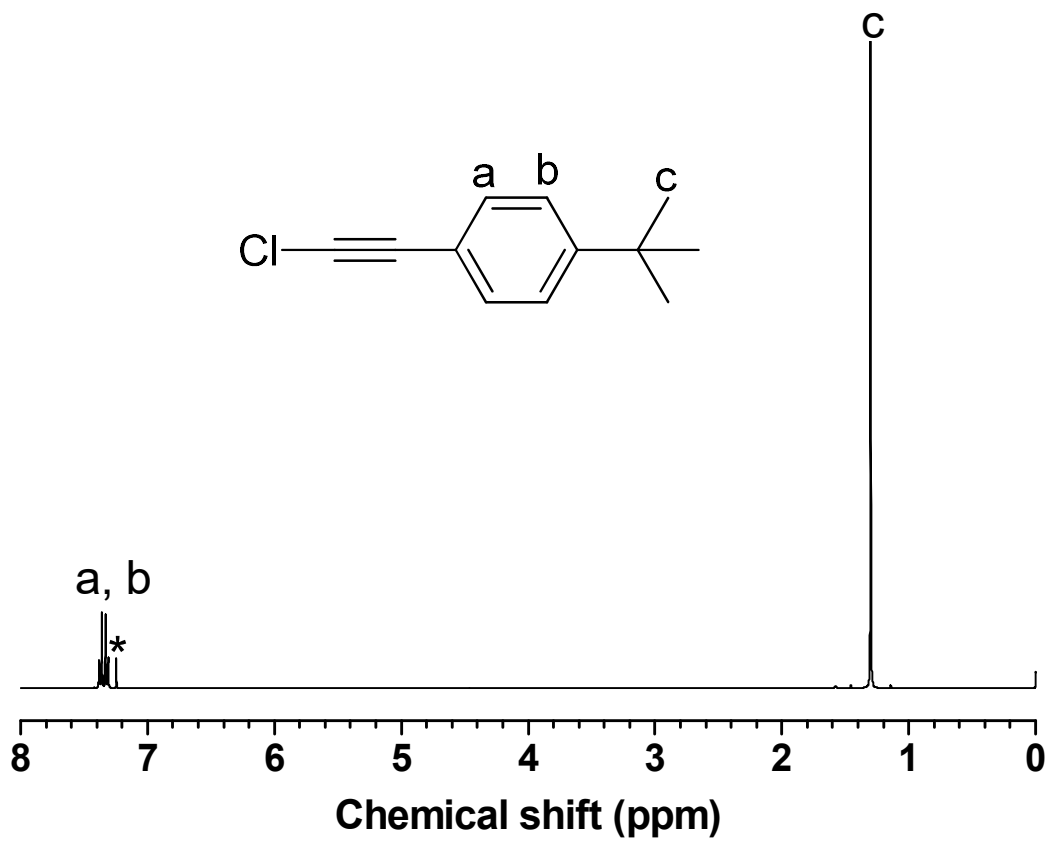

Figure S1. <sup>1</sup>H NMR spectrum of M1 in CDCl<sub>3</sub>.

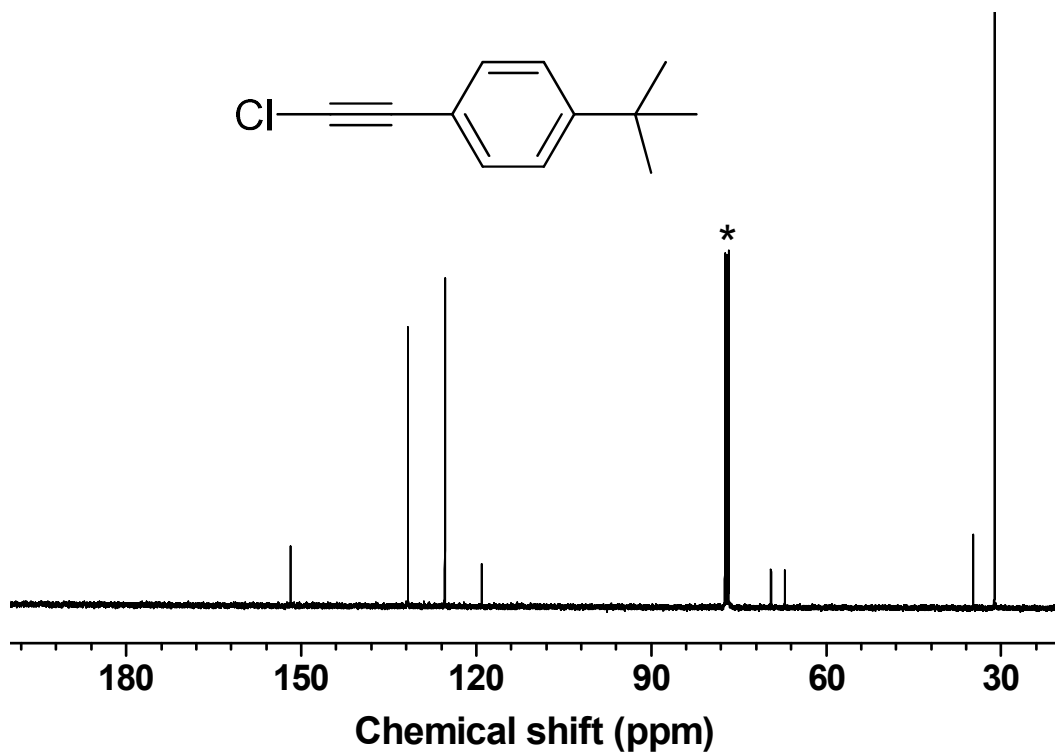

Figure S2. <sup>13</sup>C NMR spectrum of M1 in CDCl<sub>3</sub>.

Tolerance = 1.0 mDa / DBE: min = -1.5, max = 50.0  
Element prediction: Off

Monoisotopic Mass, Odd and Even Electron Ions  
46 formula(e) evaluated with 1 results within limits (up to 70 best isotopic matches for each mass)  
Elements Used:  
C: 0-50 H: 0-100 O: 0-10 Cl: 0-1  
GCT Premier ZJU  
TOF MS EI+

05-Jun-2018

yfl-nbu 977 (4.036)

4.61e+002

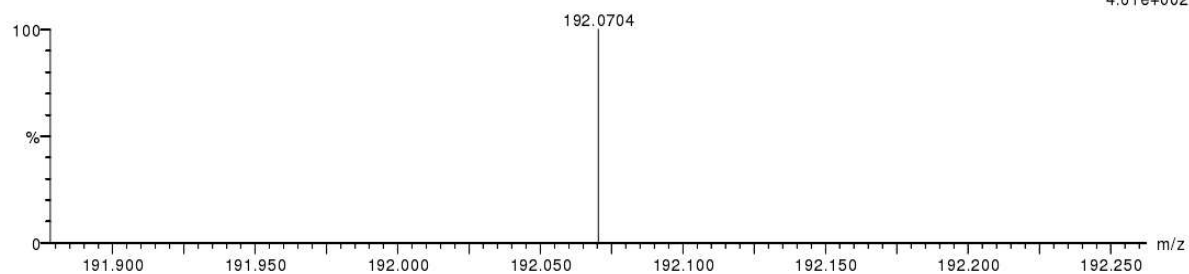

Minimum: -1.5  
Maximum: 1.0 10.0 50.0

| Mass     | Calc. Mass | mDa  | PPM  | DBE | i-FIT     | Formula    |
|----------|------------|------|------|-----|-----------|------------|
| 192.0704 | 192.0706   | -0.2 | -1.0 | 6.0 | 5546248.5 | C12 H13 Cl |

Figure S3. High resolution mass spectrum of M1.

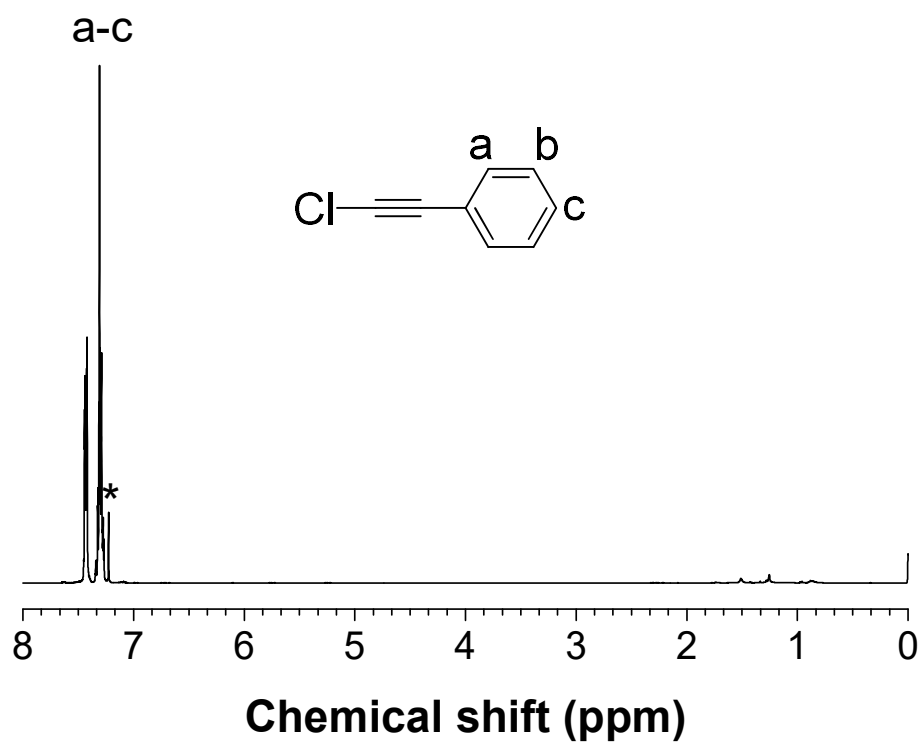

Figure S4. <sup>1</sup>H NMR spectrum of M2 in CDCl<sub>3</sub>.

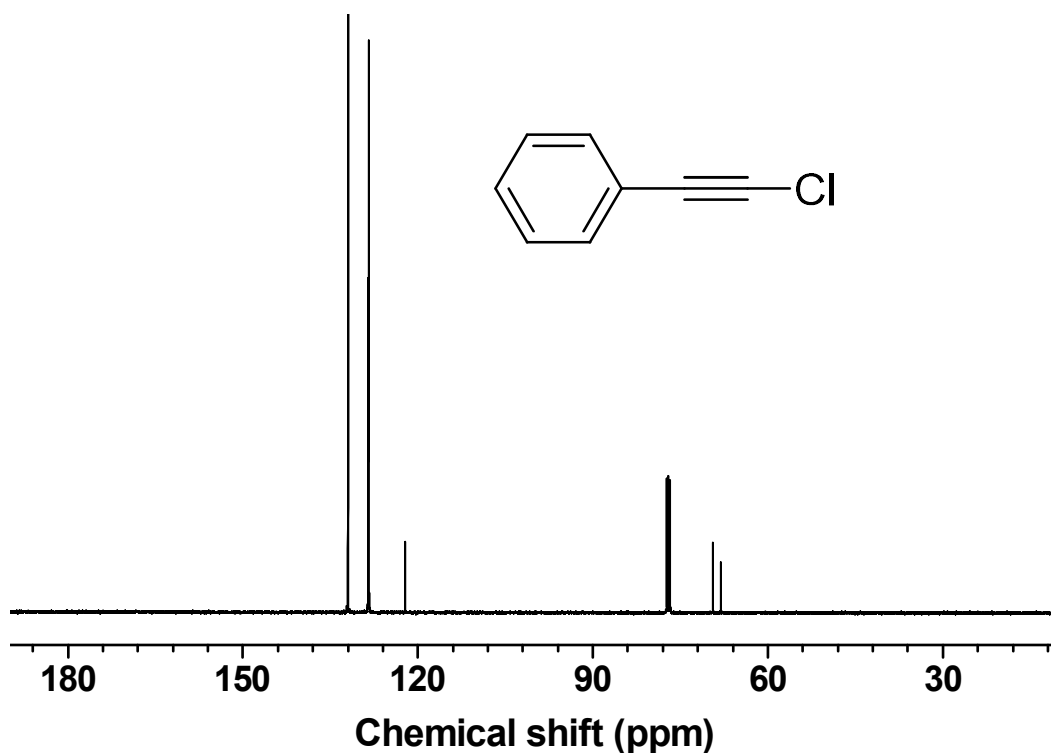

Figure S5.  $^{13}\text{C}$  NMR spectrum of M2 in  $\text{CDCl}_3$ .

Tolerance = 1.0 mDa / DBE: min = -1.5, max = 50.0

Element prediction: Off

Monoisotopic Mass, Odd and Even Electron Ions

5 formula(e) evaluated with 1 results within limits (up to 70 best isotopic matches for each mass)

Elements Used:

C: 0-100 H: 0-200 Cl: 0-1

GCT Premier ZJU

TOF MS EI+

08-May-2018

y10508-1 423 (3.504)

1.08e+003

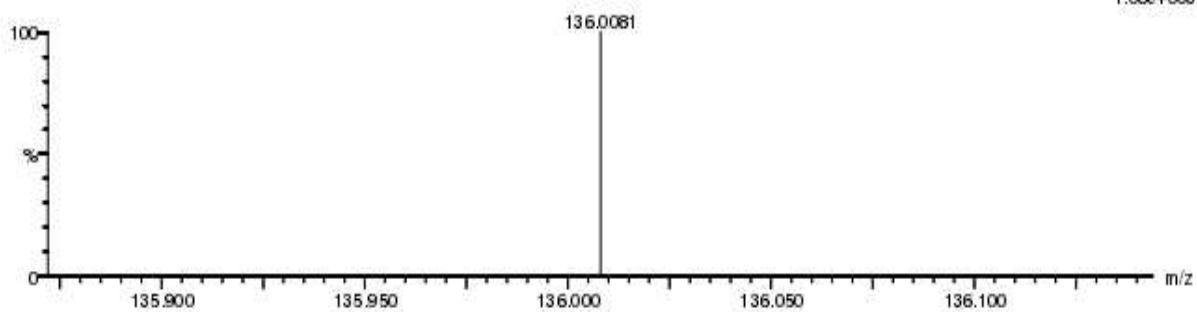

Minimum: -1.5

Maximum: 1.0 10.0 50.0

| Mass     | Calc. Mass | mDa | PPM | DBE | i-FIT     | Formula  |
|----------|------------|-----|-----|-----|-----------|----------|
| 136.0081 | 136.0080   | 0.1 | 0.7 | 6.0 | 55.6554.5 | C8 H5 Cl |

Figure S6. High resolution mass spectrum of M2.

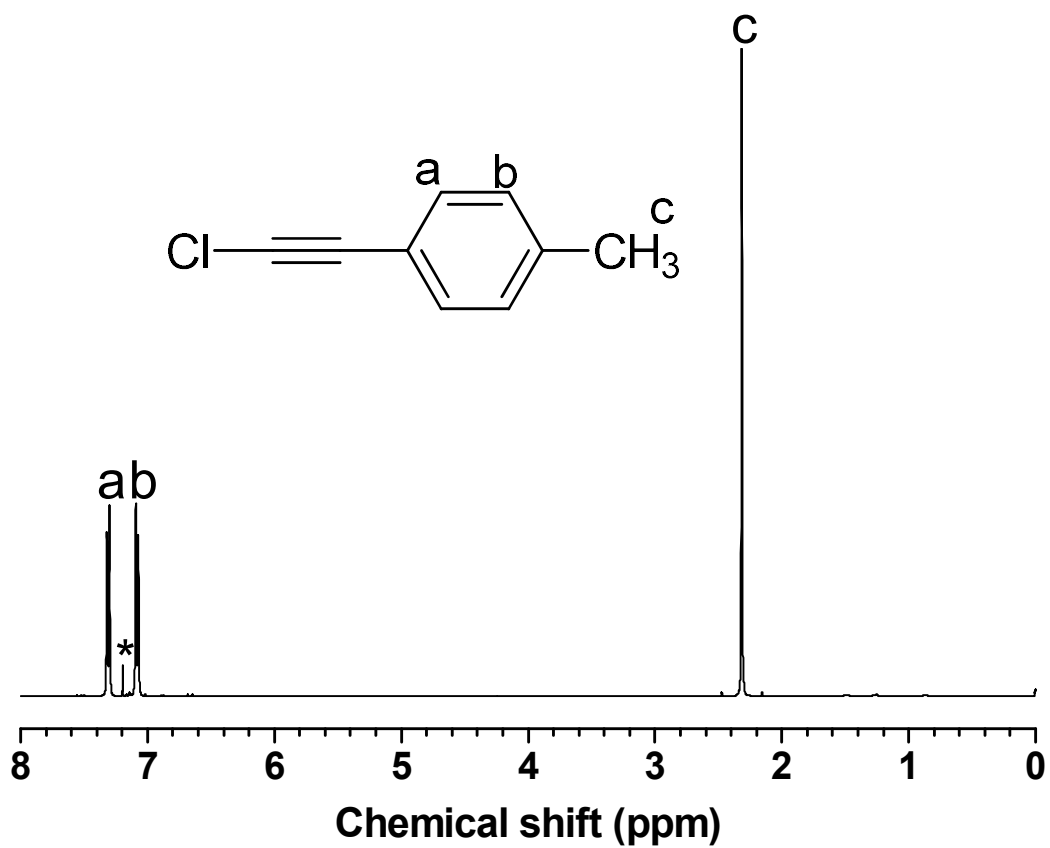

Figure S7. <sup>1</sup>H NMR spectrum of M3 in CDCl<sub>3</sub>.

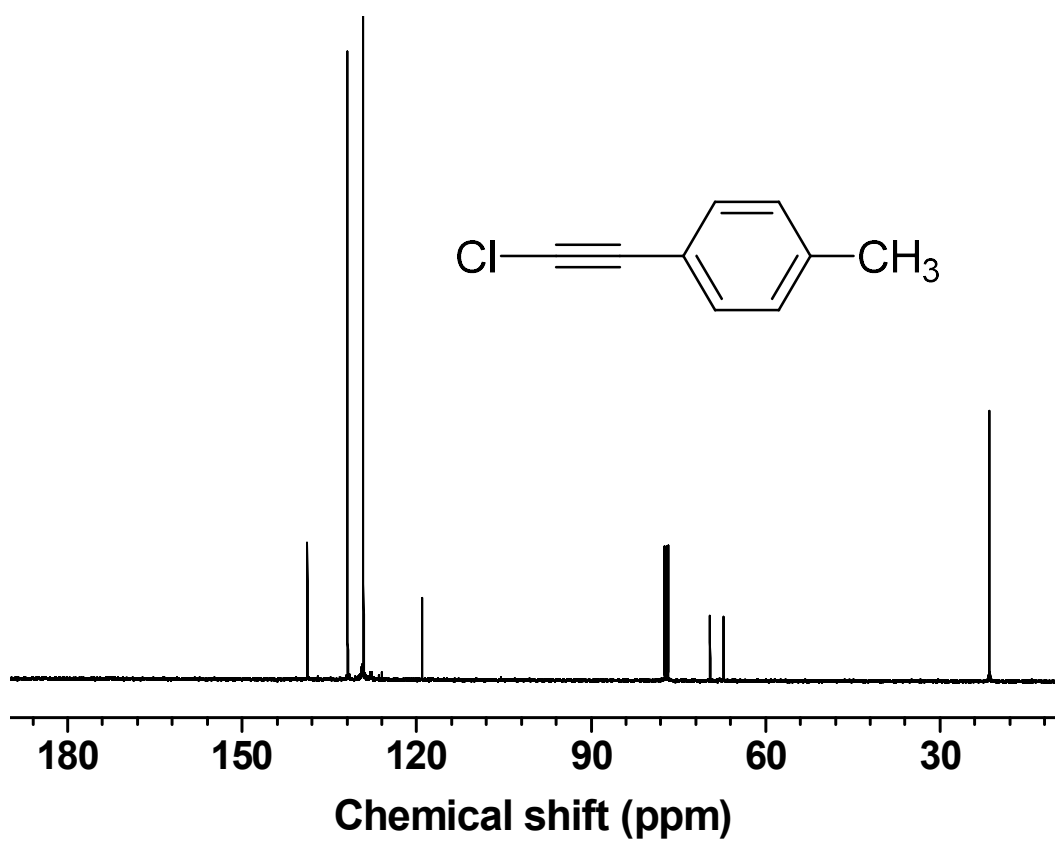

Figure S8. <sup>13</sup>C NMR spectrum of M3 in CDCl<sub>3</sub>.

Tolerance = 1.0 mDa / DBE: min = -1.5, max = 50.0  
Element prediction: Off

Monoisotopic Mass, Odd and Even Electron Ions

5 formula(e) evaluated with 1 results within limits (up to 70 best isotopic matches for each mass)

Elements Used:

C: 0-100 H: 0-200 Cl: 0-1

GCT Premier ZJU

TOF MS EI+

08-May-2018

yf10508-2 456 (3.625)

2.19e+003

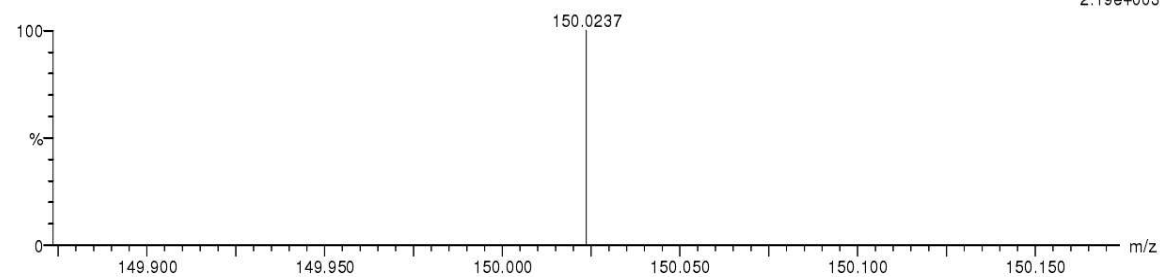

| Minimum: |            |      |     | -1.5 |           |          |
|----------|------------|------|-----|------|-----------|----------|
| Maximum: | 1.0        | 10.0 |     | 50.0 |           |          |
| Mass     | Calc. Mass | mDa  | PPM | DBE  | i-RIT     | Formula  |
| 150.0237 | 150.0236   | 0.1  | 0.7 | 6.0  | 5547112.0 | C9 H7 Cl |

Figure S9. High resolution mass spectrum of M3.

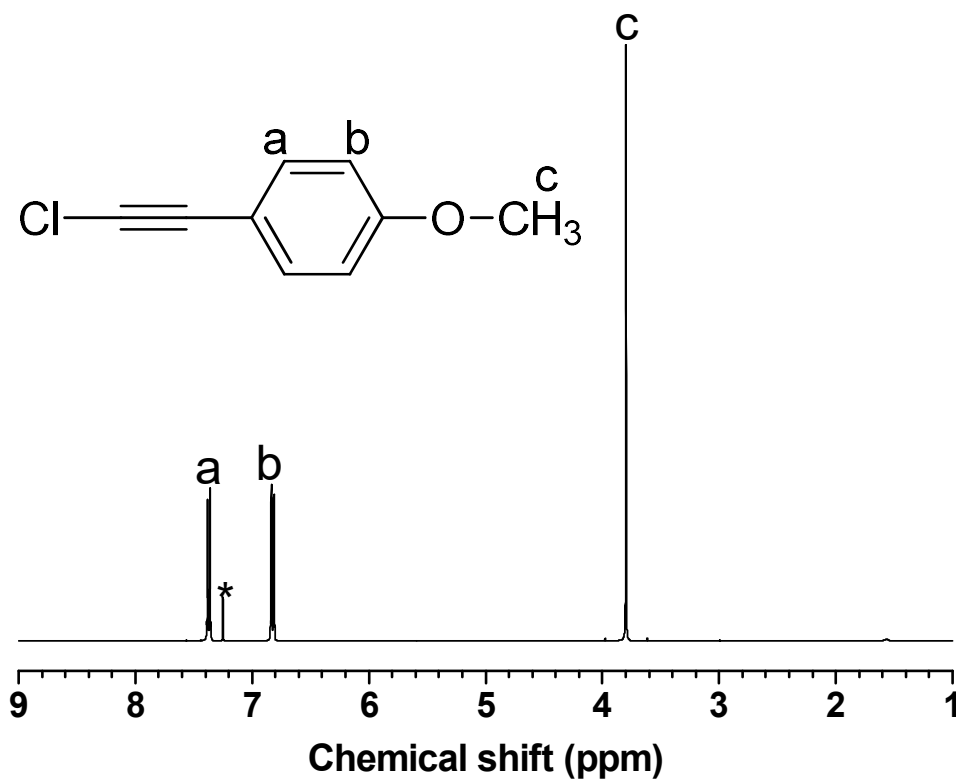

Figure S10. <sup>1</sup>H NMR spectrum of M4 in CDCl<sub>3</sub>.



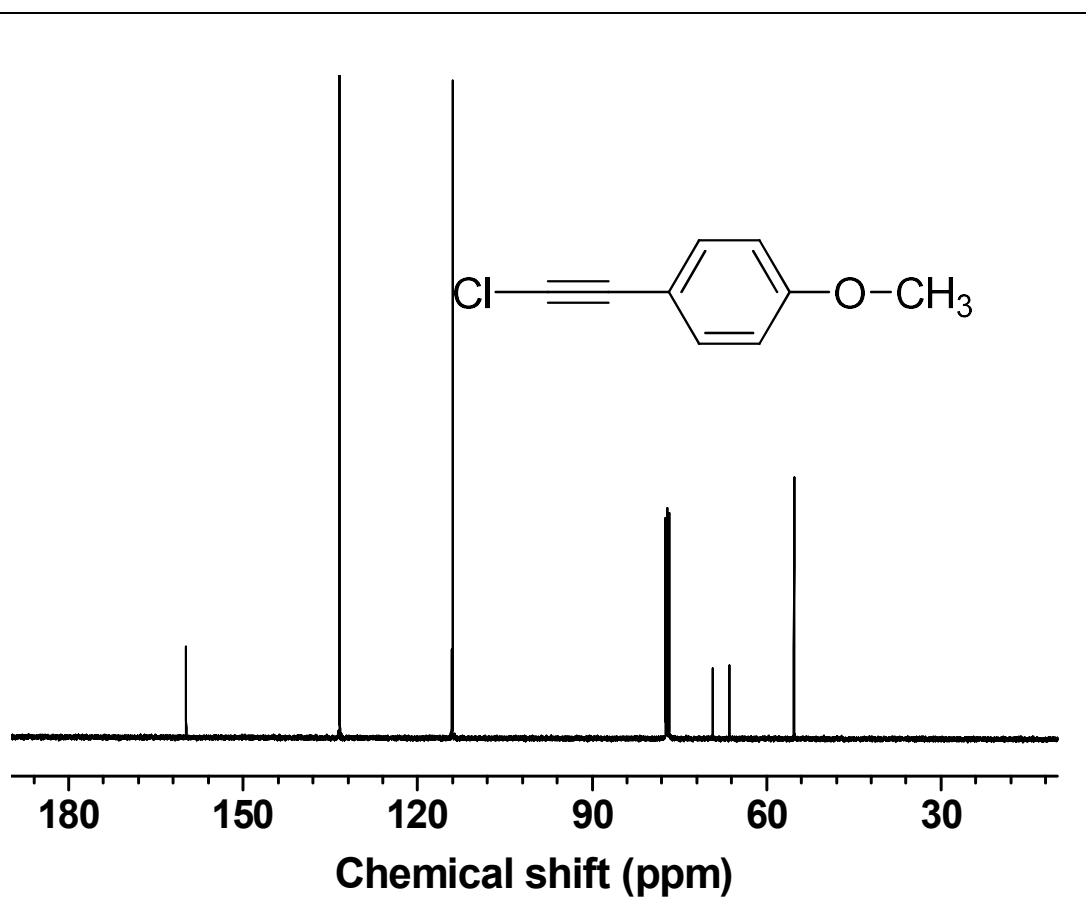

Figure S11.  $^{13}\text{C}$  NMR spectrum of M4 in  $\text{CDCl}_3$ .

Tolerance = 1.0 mDa / DBE: min = -1.5, max = 50.0  
 Element prediction: Off

Monoisotopic Mass, Odd and Even Electron Ions  
 72 formula(e) evaluated with 1 results within limits (up to 70 best isotopic matches for each mass)  
 Elements Used:  
 C: 0-100 H: 0-200 N: 0-3 O: 0-4 S: 0-1 Cl: 1-1  
 GCT Premier ZJU  
 TOF MS EI+

12-Apr-2018

yfID412-1 615 (4.208)

1.39e+003

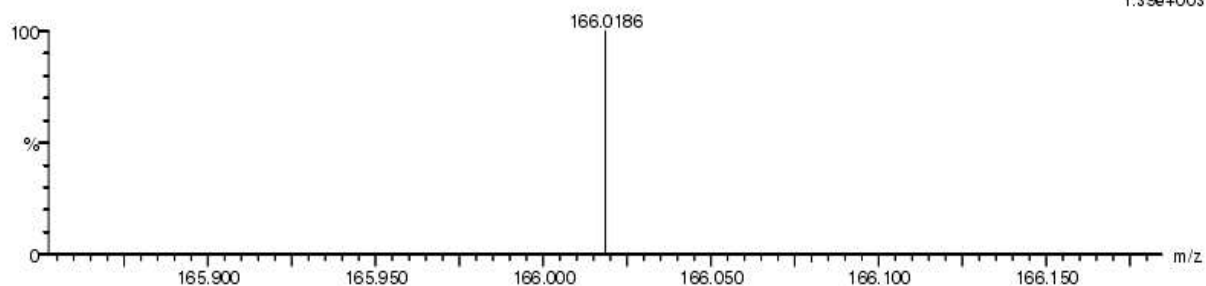

| Mass     | Calc. Mass | mDa | PPM | DBE | i-FIT     | Formula    |
|----------|------------|-----|-----|-----|-----------|------------|
| 166.0186 | 166.0185   | 0.1 | 0.6 | 6.0 | 5546710.0 | C9 H7 O Cl |

Figure S12. High resolution mass spectrum of M4.

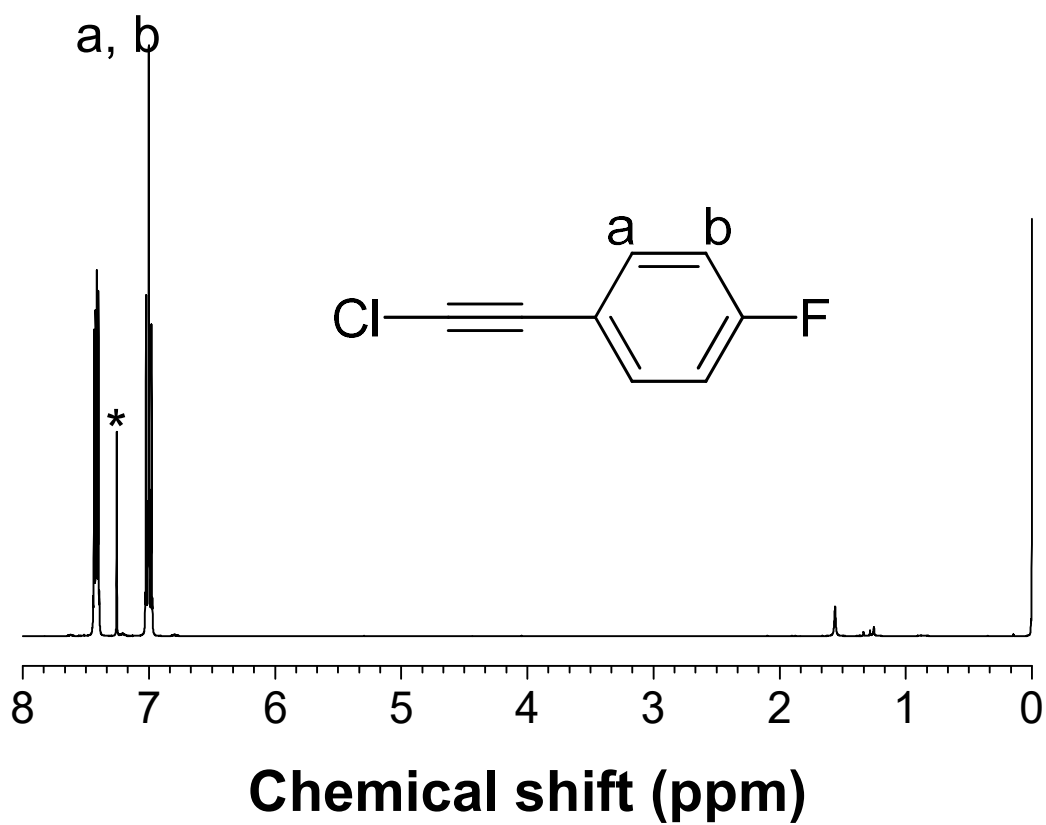

Figure S13.  $^1\text{H}$  NMR spectrum of M5 in  $\text{CDCl}_3$ .

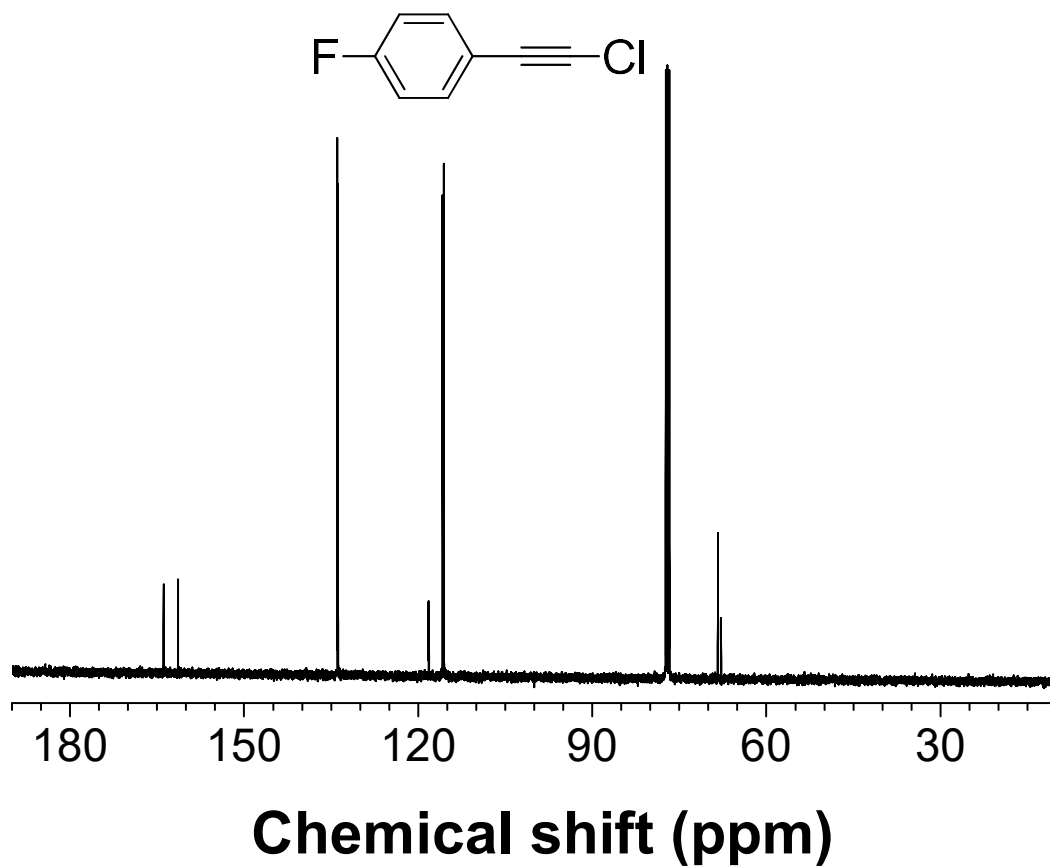

**Figure S14.**  $^{13}\text{C}$  NMR spectrum of M5 in  $\text{CDCl}_3$ .

Tolerance = 1.0 mDa / DBE: min = -1.5, max = 50.0  
Element prediction: Off

Monoisotopic Mass, Odd and Even Electron Ions  
10 formula(e) evaluated with 1 results within limits (up to 70 best isotopic matches for each mass)  
Elements Used:  
C: 0-100 H: 0-200 Cl: 0-1 F: 0-1

GCT Premier ZJU  
TOF MS EI+

08-May-2018

yfl0508-4 345 (3.218)

2.34e+003

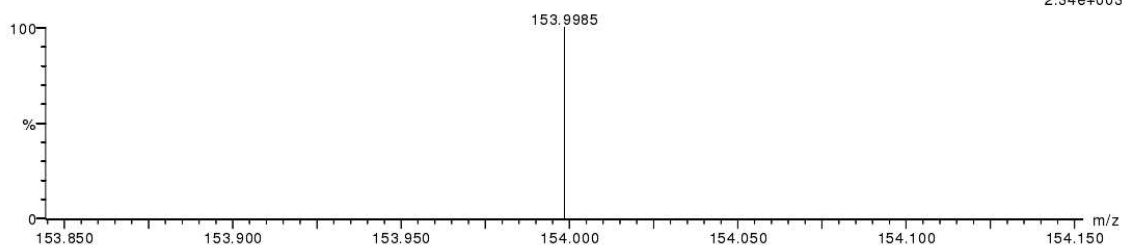

Minimum:  
Maximum:

1.0 10.0 -1.5  
50.0

| Mass     | Calc. Mass | mDa  | PPM  | DBE | i-FIT     | Formula    |
|----------|------------|------|------|-----|-----------|------------|
| 153.9985 | 153.9986   | -0.1 | -0.6 | 6.0 | 5547185.0 | C8 H4 Cl F |

**Figure S15.** High resolution mass spectrum of M5.

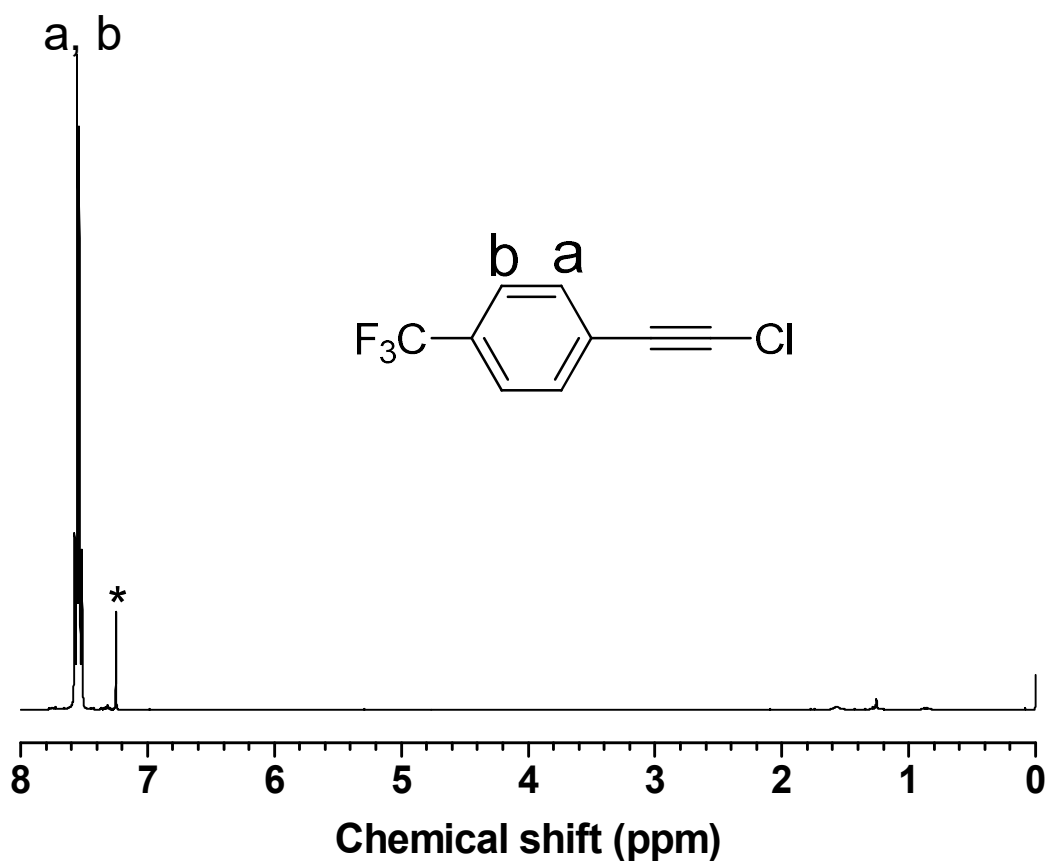

**Figure S16.**  $^1\text{H}$  NMR spectrum of M6 in  $\text{CDCl}_3$ .

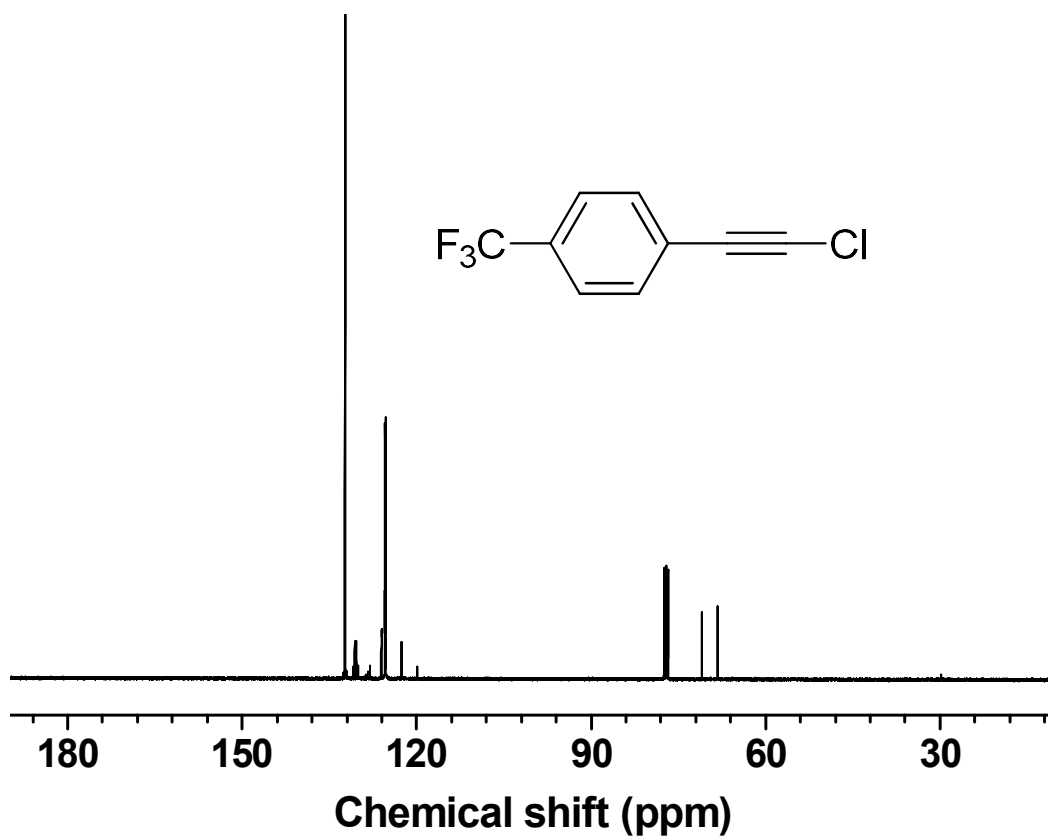

Figure S17.  $^{13}\text{C}$  NMR spectrum of M6 in  $\text{CDCl}_3$ .

Tolerance = 1.0 mDa / DBE: min = -1.5, max = 50.0  
Element prediction: Off

Monoisotopic Mass, Odd and Even Electron Ions  
23 formula(e) evaluated with 1 results within limits (up to 70 best isotopic matches for each mass)  
Elements Used:  
C: 0-100 H: 0-200 F: 0-3 Cl: 0-1  
GCT Premier ZJU  
TOF MS EI+

08-May-2018

yfl0508-5 370 (3.309)

2.26e+003

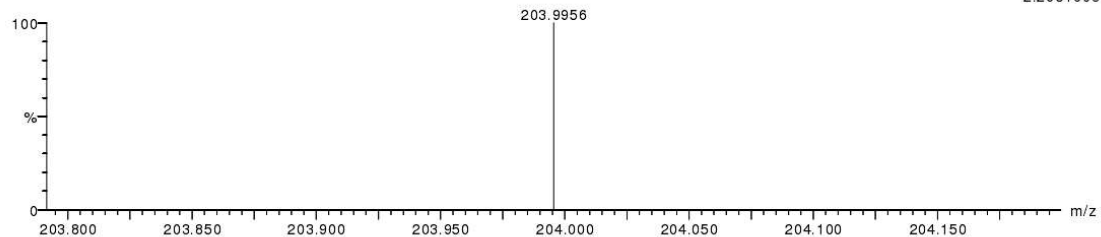

| Mass     | Calc. Mass | mDa | PPM | DBE | i-FIT     | Formula     |
|----------|------------|-----|-----|-----|-----------|-------------|
| 203.9956 | 203.9954   | 0.2 | 1.0 | 6.0 | 5547147.0 | C9 H4 F3 Cl |

Figure S18. High resolution mass spectrum of M6.

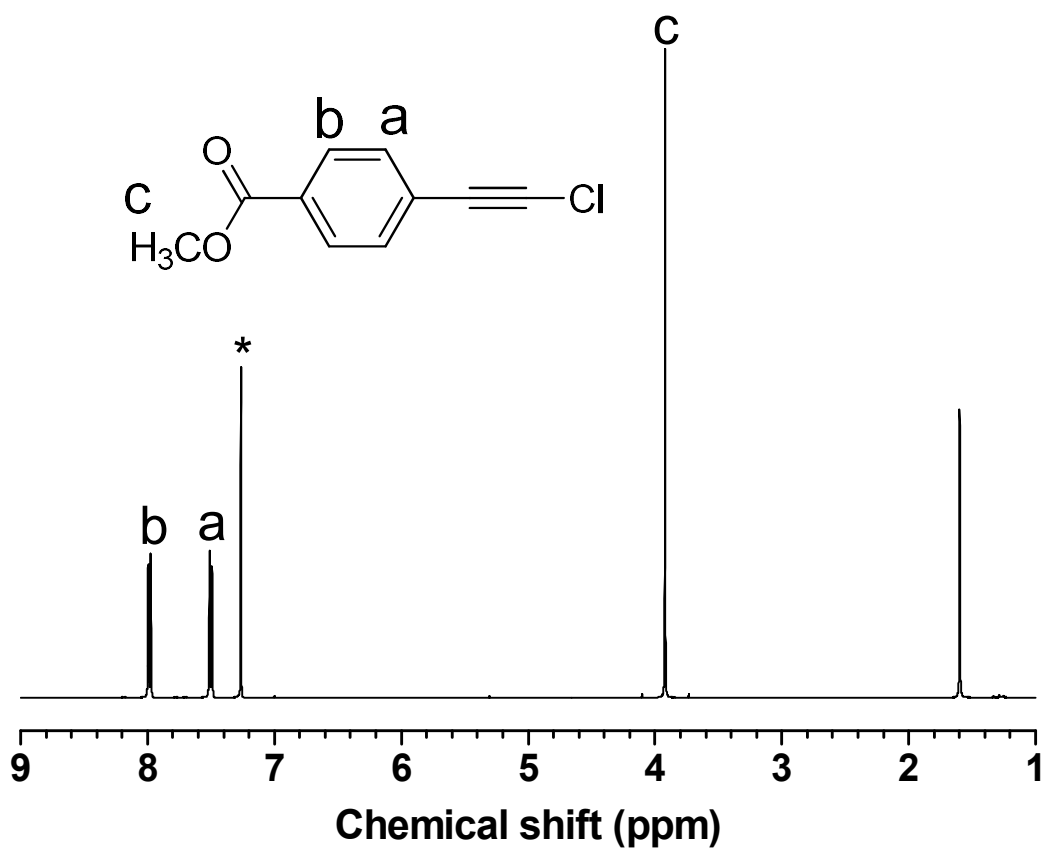

Figure S19.  $^1\text{H}$  NMR spectrum of M7 in  $\text{CDCl}_3$ .

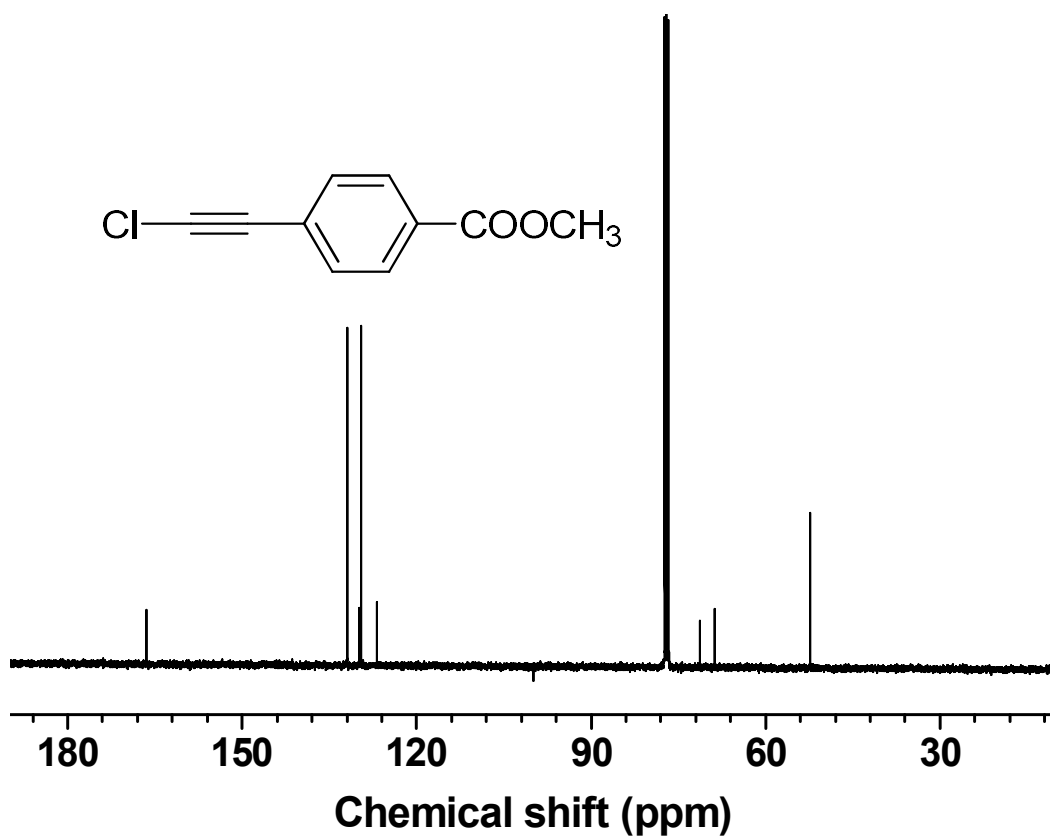

Figure S20.  $^{13}\text{C}$  NMR spectrum of M7 in  $\text{CDCl}_3$ .

Monoisotopic Mass, Odd and Even Electron Ions  
47 formula(e) evaluated with 1 results within limits (up to 70 best isotopic matches for each mass)  
Elements Used:  
C: 0-50 H: 0-100 O: 0-10 Cl: 0-1  
GCT Premier ZJU  
TOF MS EI+

05-Jun-2018

yfl-cooc 452 (2.110)

1.51e+003

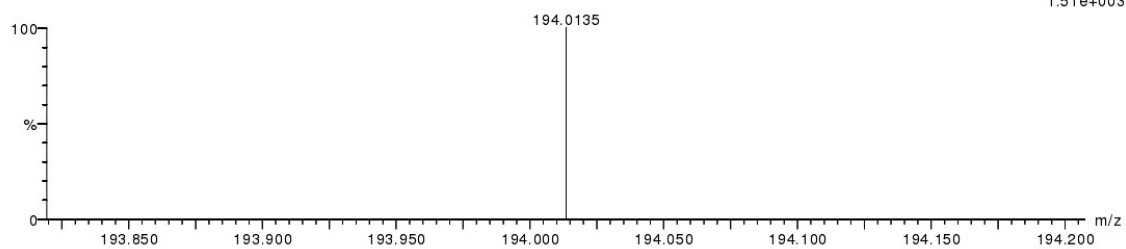

Minimum: -1.5  
Maximum: 1.0 10.0 50.0

| Mass     | Calc. Mass | mDa | PPM | DBE | i-FIT     | Formula      |
|----------|------------|-----|-----|-----|-----------|--------------|
| 194.0135 | 194.0135   | 0.0 | 0.0 | 7.0 | 5546774.0 | C10 H7 O2 Cl |

Figure S21. High resolution mass spectrum of M7.

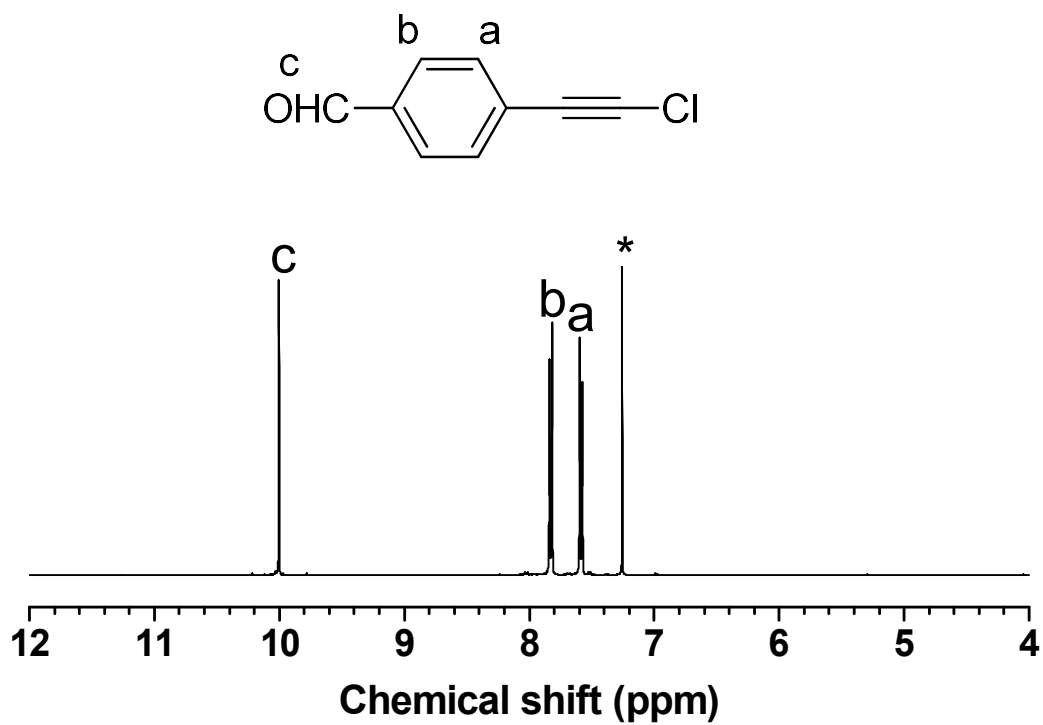

Figure S22. <sup>1</sup>H NMR spectrum of M8 in CDCl<sub>3</sub>.

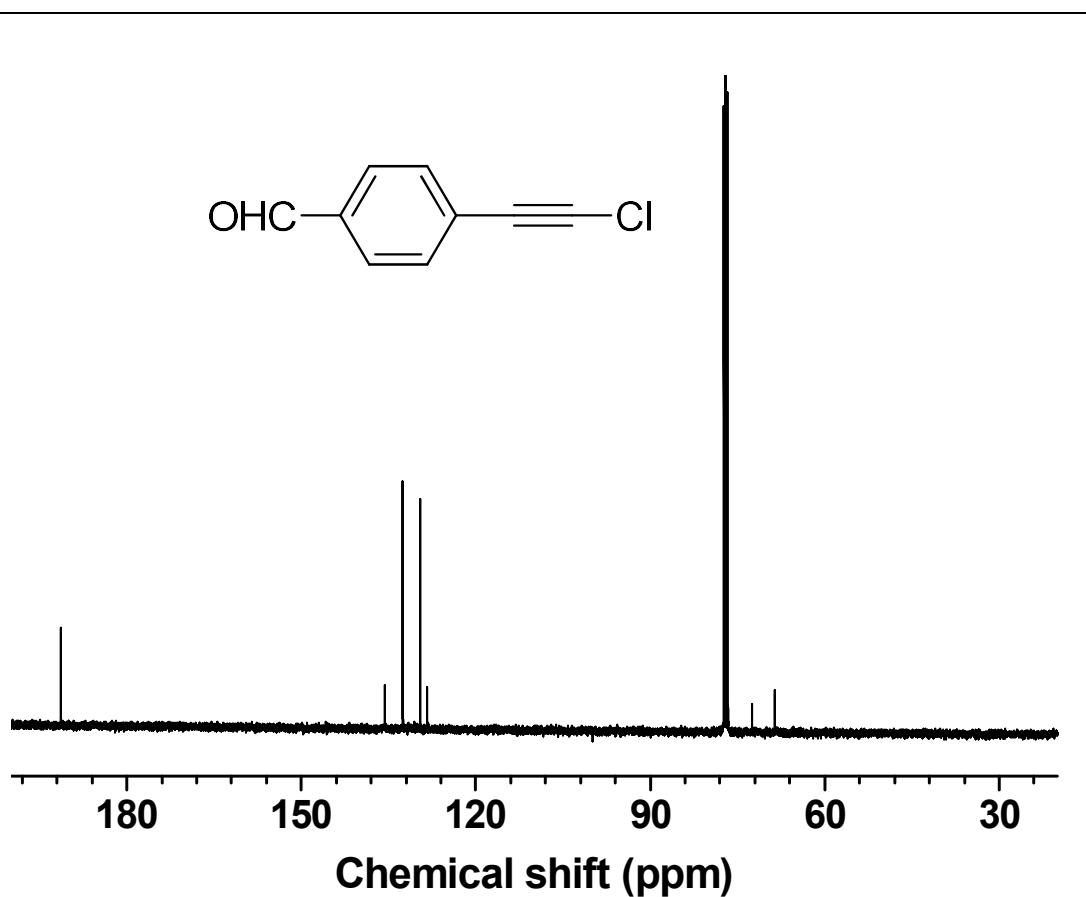

Figure S23.  $^{13}\text{C}$  NMR spectrum of M8 in  $\text{CDCl}_3$ .

Tolerance = 1.0 mDa / DBE: min = -1.5, max = 50.0  
 Element prediction: Off

Monoisotopic Mass, Odd and Even Electron Ions

73 formula(e) evaluated with 1 results within limits (up to 70 best isotopic matches for each mass)

Elements Used:

C: 0-100 H: 0-200 N: 0-3 O: 0-4 S: 0-1 Cl: 1-1

GCT Premier ZJU

TOF MS EI+

12-Apr-2018

yfl0412-3 609 (4.179)

7.43e+002

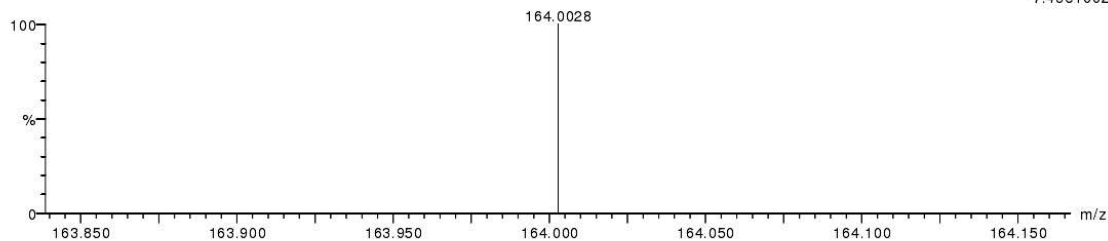

Minimum: -1.5  
 Maximum: 50.0

| Mass     | Calc. Mass | mDa  | PPM  | DBE | i-FIT     | Formula    |
|----------|------------|------|------|-----|-----------|------------|
| 164.0028 | 164.0029   | -0.1 | -0.6 | 7.0 | 5546388.5 | C9 H5 O Cl |

Figure S24. High resolution mass spectrum of M8.

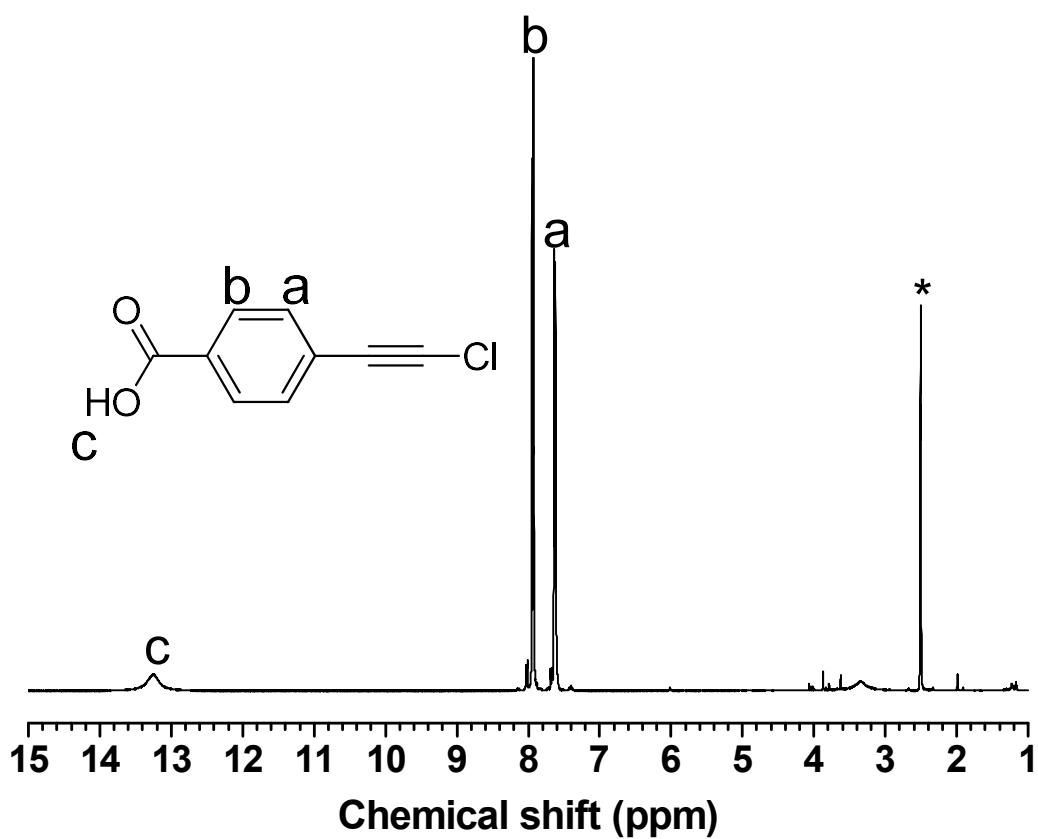

Figure S25. <sup>1</sup>H NMR spectrum of M9 in DMSO-*d*<sub>6</sub>.

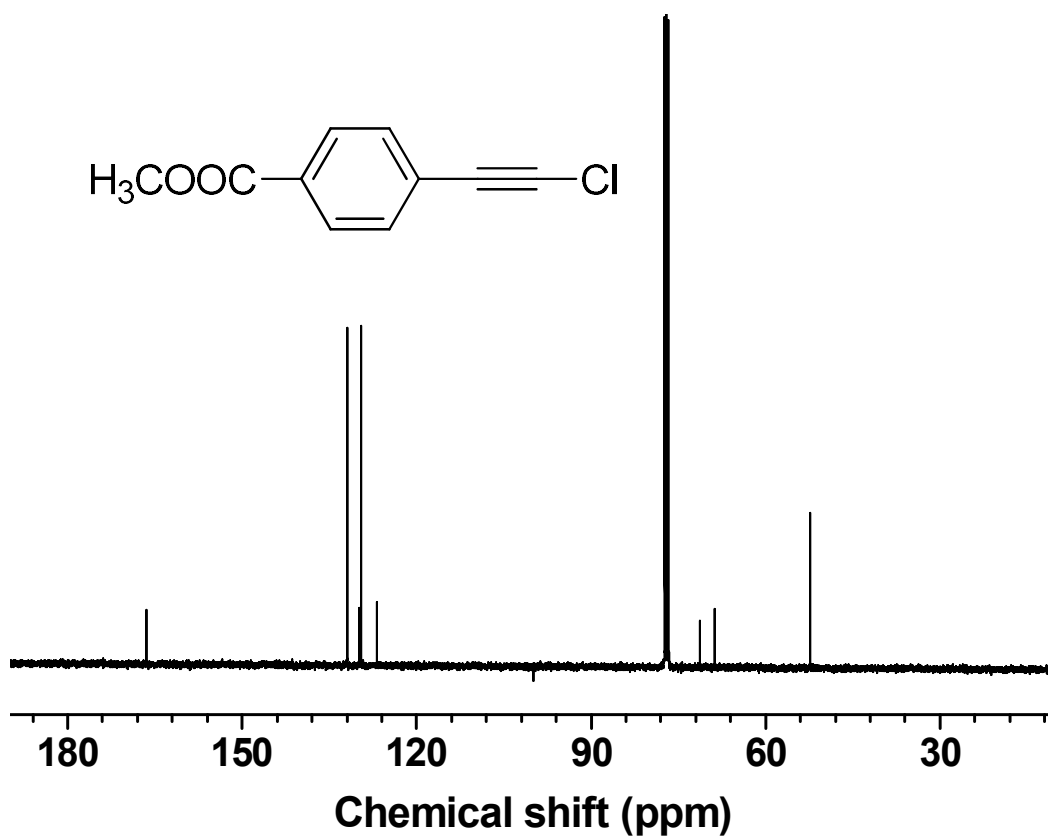

Figure S26. <sup>13</sup>C NMR spectrum of M9 in DMSO-*d*<sub>6</sub>.



Tolerance = 1.0 mDa / DBE: min = -1.5, max = 50.0  
Element prediction: Off

Monoisotopic Mass, Odd and Even Electron Ions  
15 formula(e) evaluated with 1 results within limits (up to 70 best isotopic matches for each mass)  
Elements Used:  
C: 0-100 H: 0-200 O: 0-6 Cl: 1-1  
GCT Premier ZJU  
TOF MS EI+

02-Jul-2018

yflcooh 443 (3.577)

5.61e+002

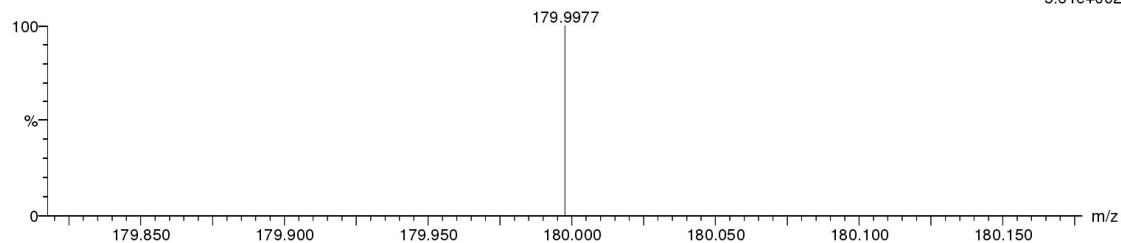

| Minimum: |            |      |      | -1.5 |           |             |
|----------|------------|------|------|------|-----------|-------------|
| Maximum: | 1.0        | 10.0 |      | 50.0 |           |             |
| Mass     | Calc. Mass | mDa  | PPM  | DBE  | i-FIT     | Formula     |
| 179.9977 | 179.9978   | -0.1 | -0.6 | 7.0  | 5546298.0 | C9 H5 O2 Cl |

Figure S27. High resolution mass spectrum of M9.

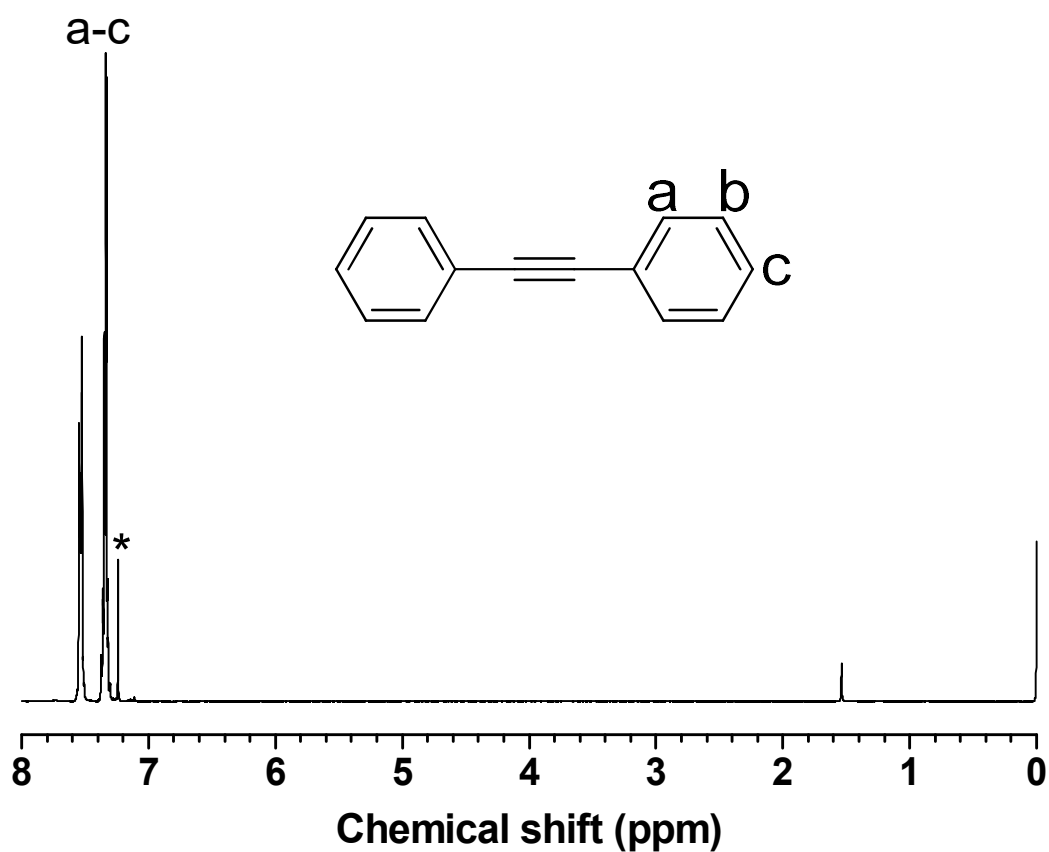

Figure S28. <sup>1</sup>H NMR spectrum of M10 in CDCl<sub>3</sub>.

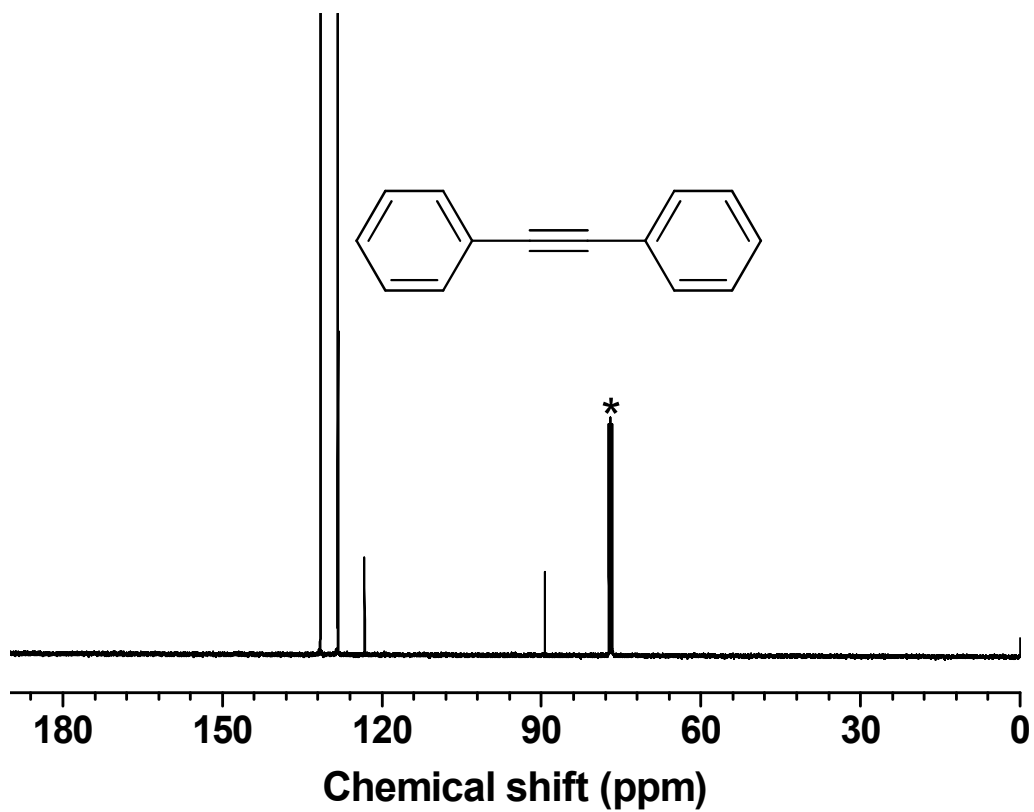

Figure S29.  $^{13}\text{C}$  NMR spectrum of M10 in  $\text{CDCl}_3$ .

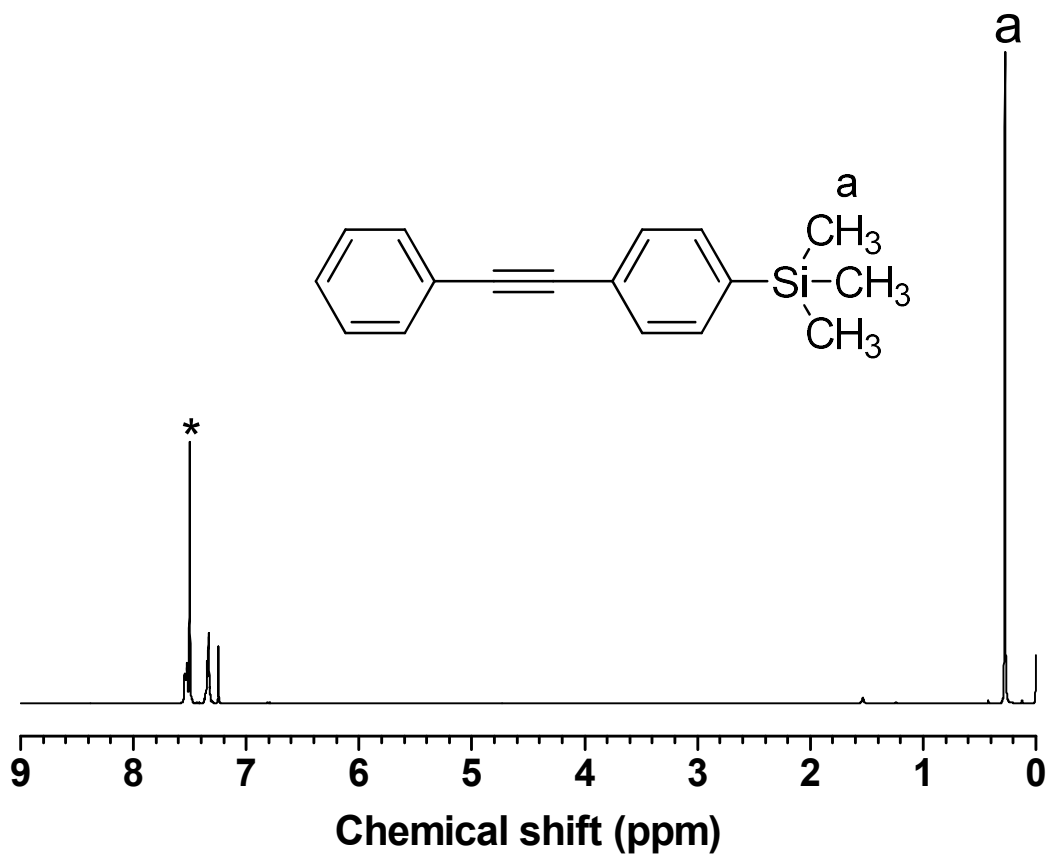

Figure S30.  $^1\text{H}$  NMR spectrum of M11 in  $\text{CDCl}_3$ .

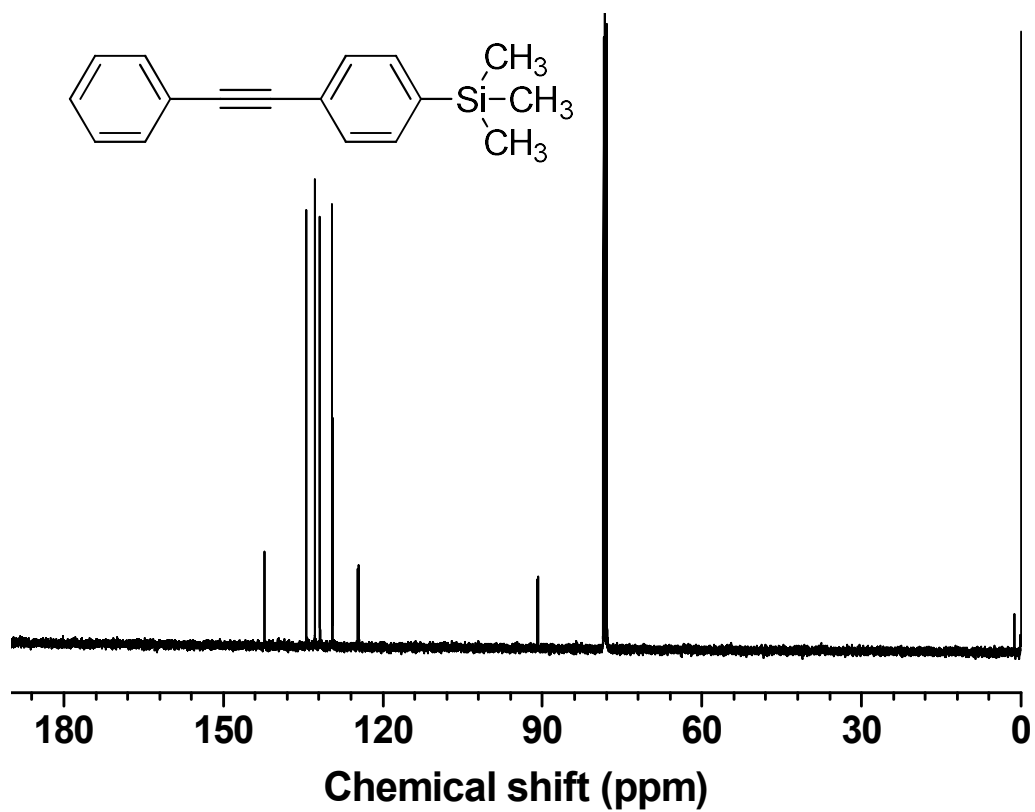

Figure S31.  $^{13}\text{C}$  NMR spectrum of M11 in  $\text{CDCl}_3$ .

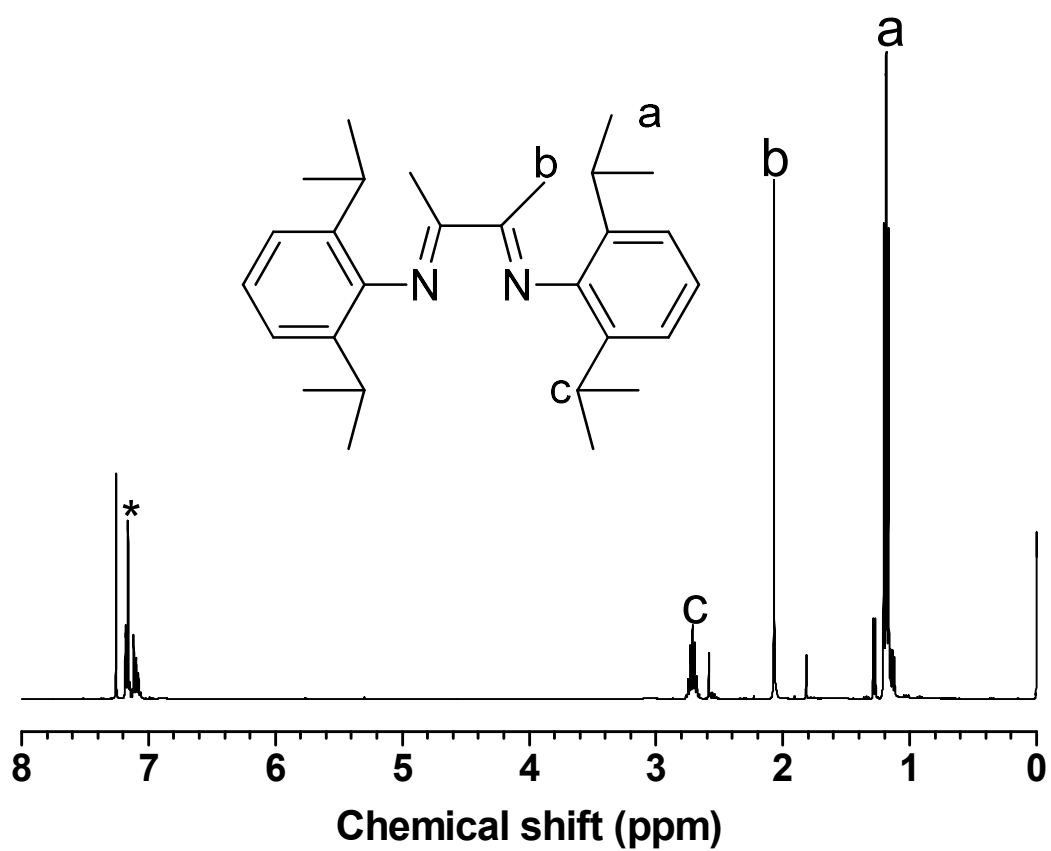

Figure S32.  $^1\text{H}$  NMR spectrum of  $\alpha$ -diimine ligand in  $\text{CDCl}_3$ .

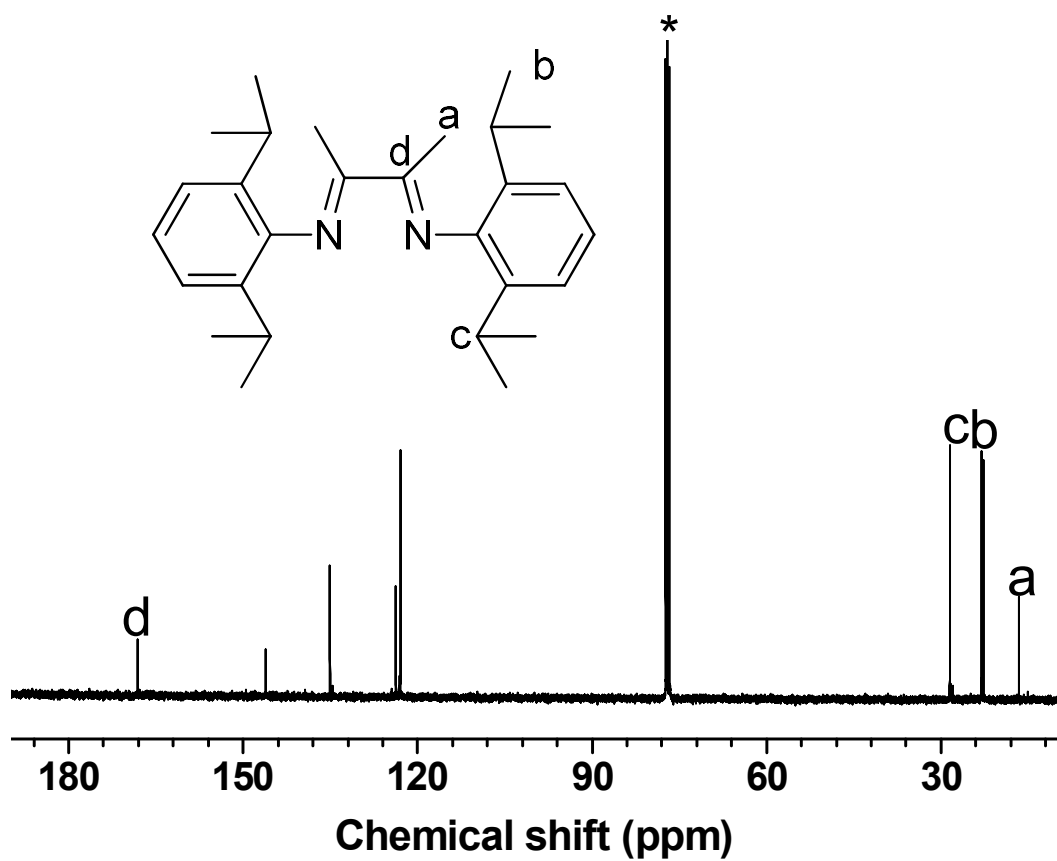

Figure S33.  $^{13}\text{C}$  NMR spectrum of  $\alpha$ -diimine ligand in  $\text{CDCl}_3$ .

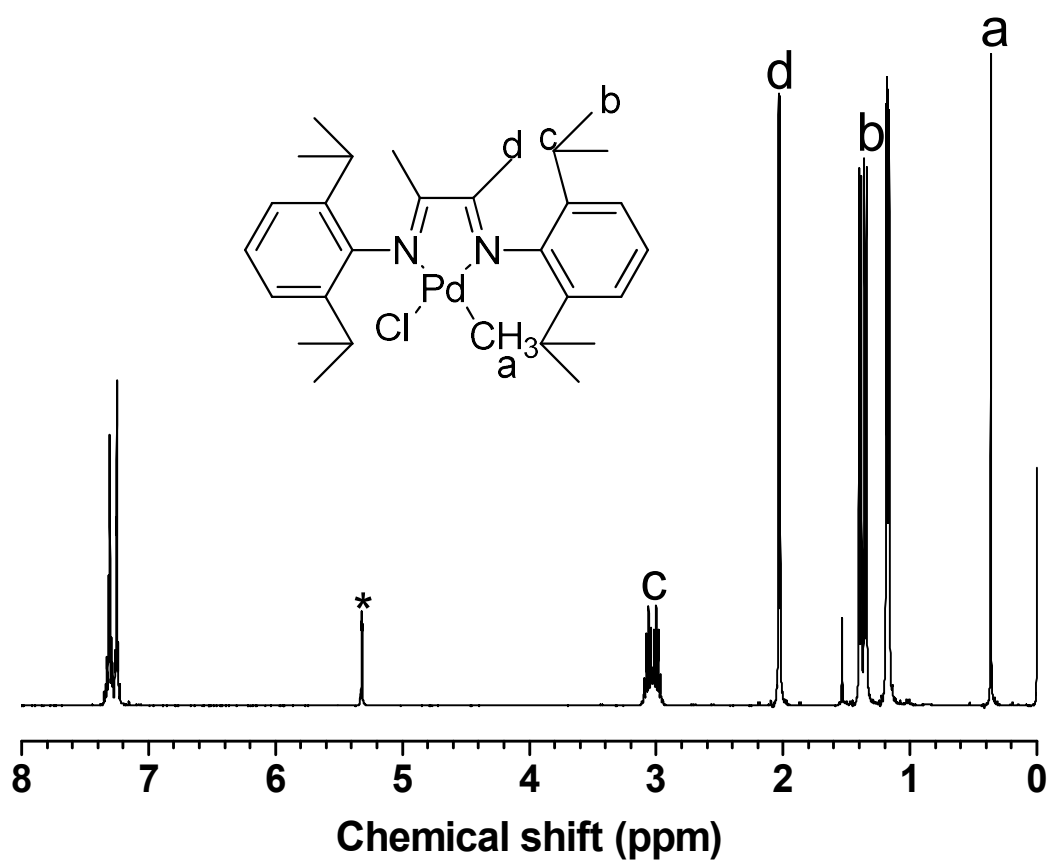

Figure S34.  $^1\text{H}$  NMR spectrum of  $(\alpha\text{-diimine})\text{PdMeCl}$  complex in  $\text{CD}_2\text{Cl}_2$ .

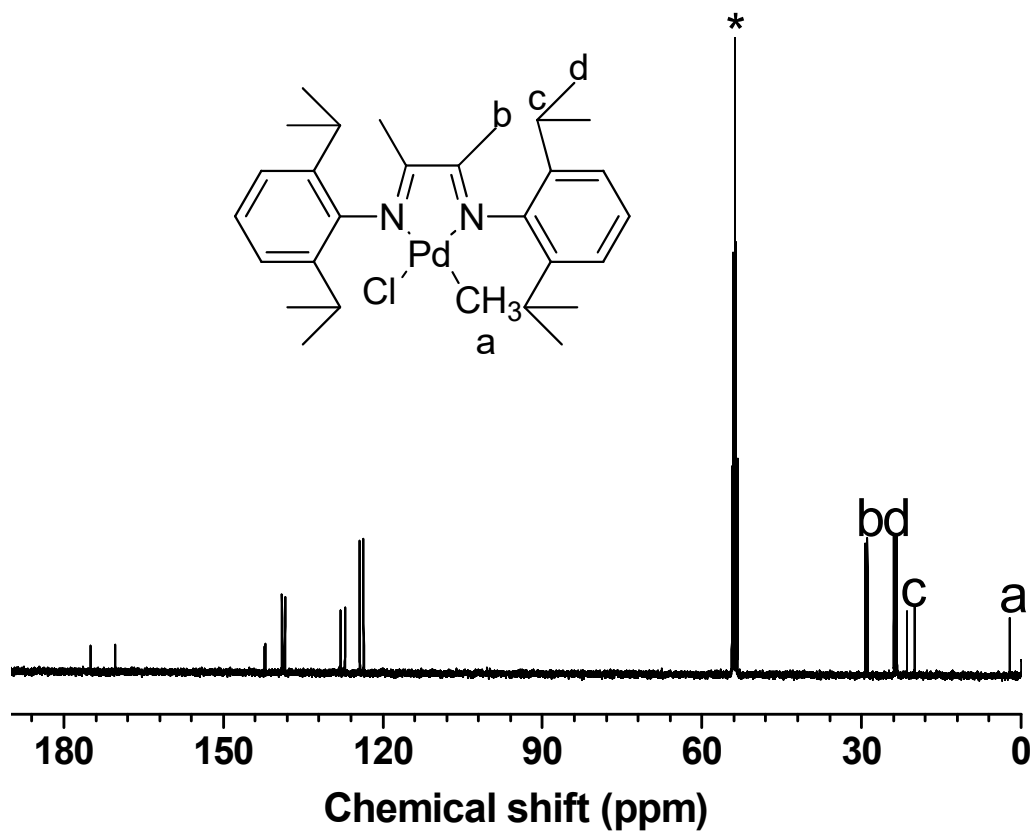

Figure S35.  $^{13}\text{C}$  NMR spectrum of ( $\alpha$ -diimine)PdMeCl complex in  $\text{CD}_2\text{Cl}_2$ .

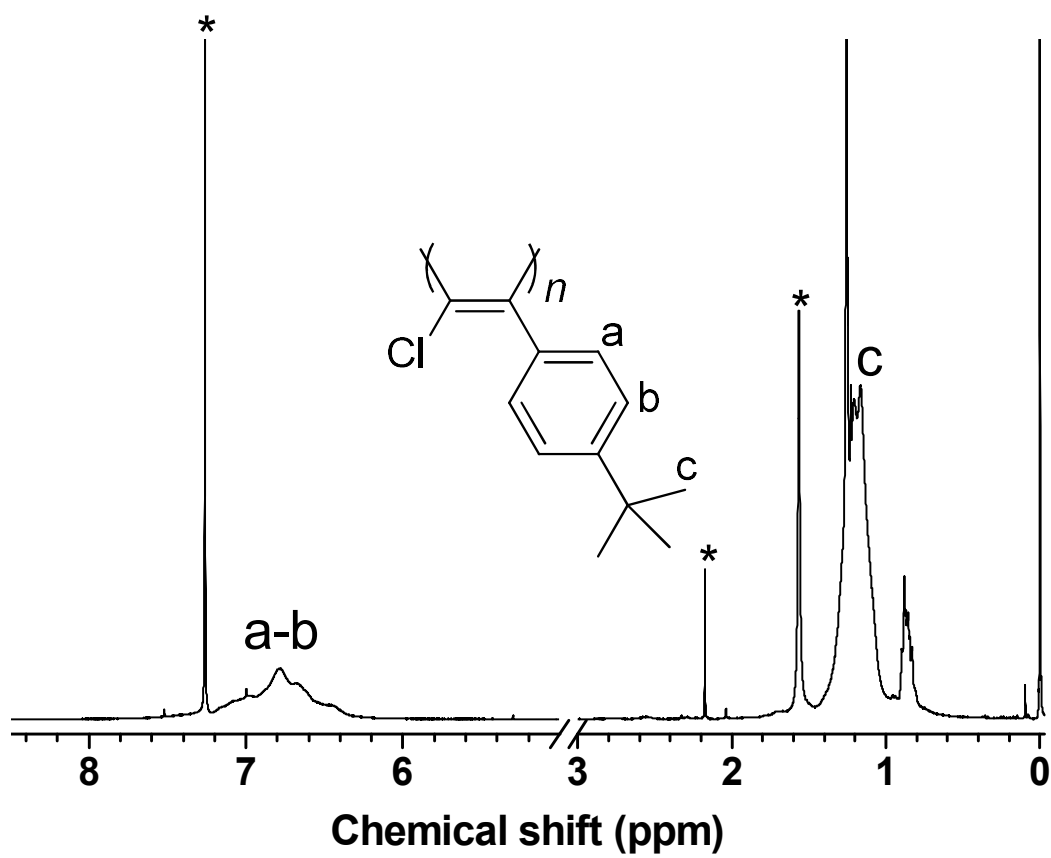

Figure S36.  $^1\text{H}$  NMR spectrum of P1(Ag) in  $\text{CDCl}_3$ .

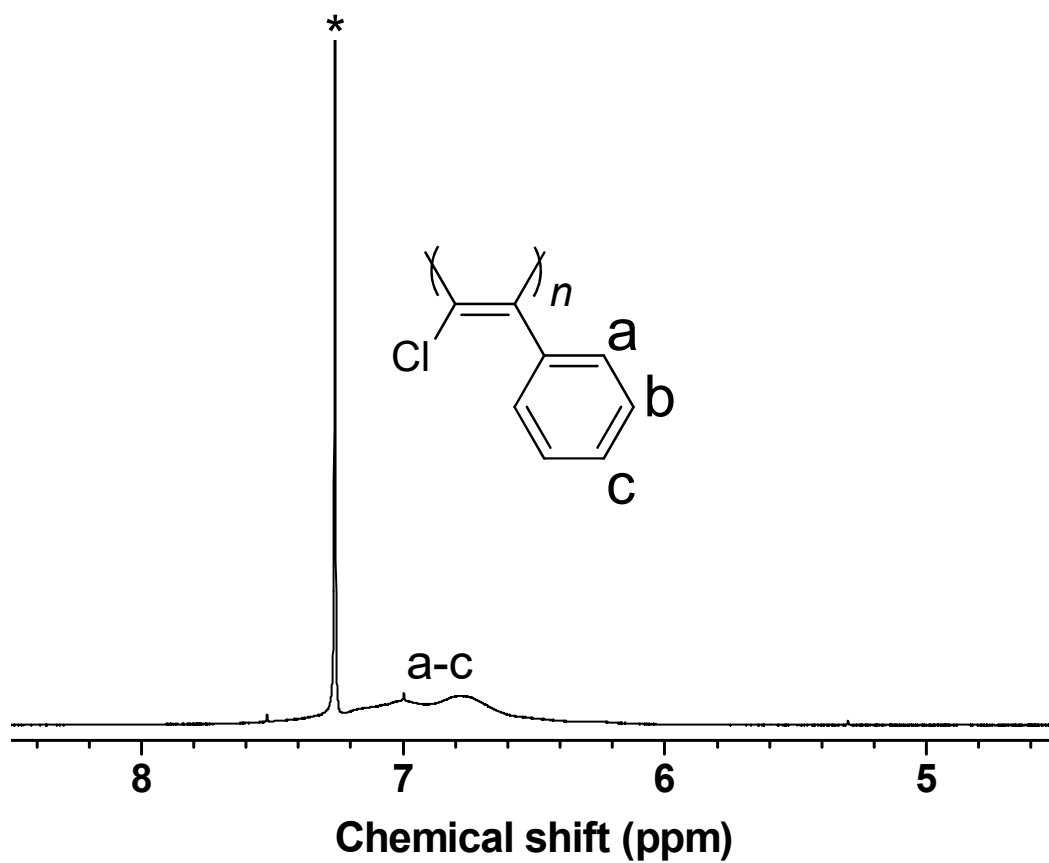

Figure S37.  $^1\text{H}$  NMR spectrum of P2(Ag) in  $\text{CDCl}_3$ .

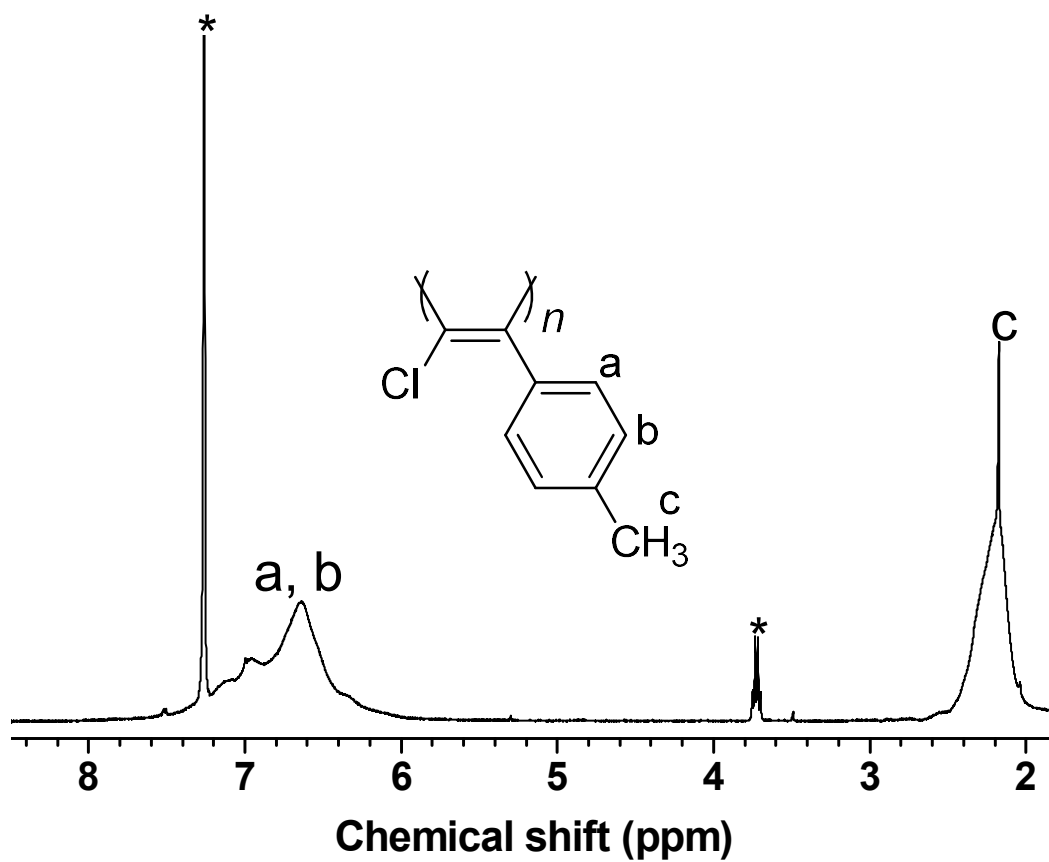

Figure S38.  $^1\text{H}$  NMR spectrum of P3(Ag) in  $\text{CDCl}_3$ .

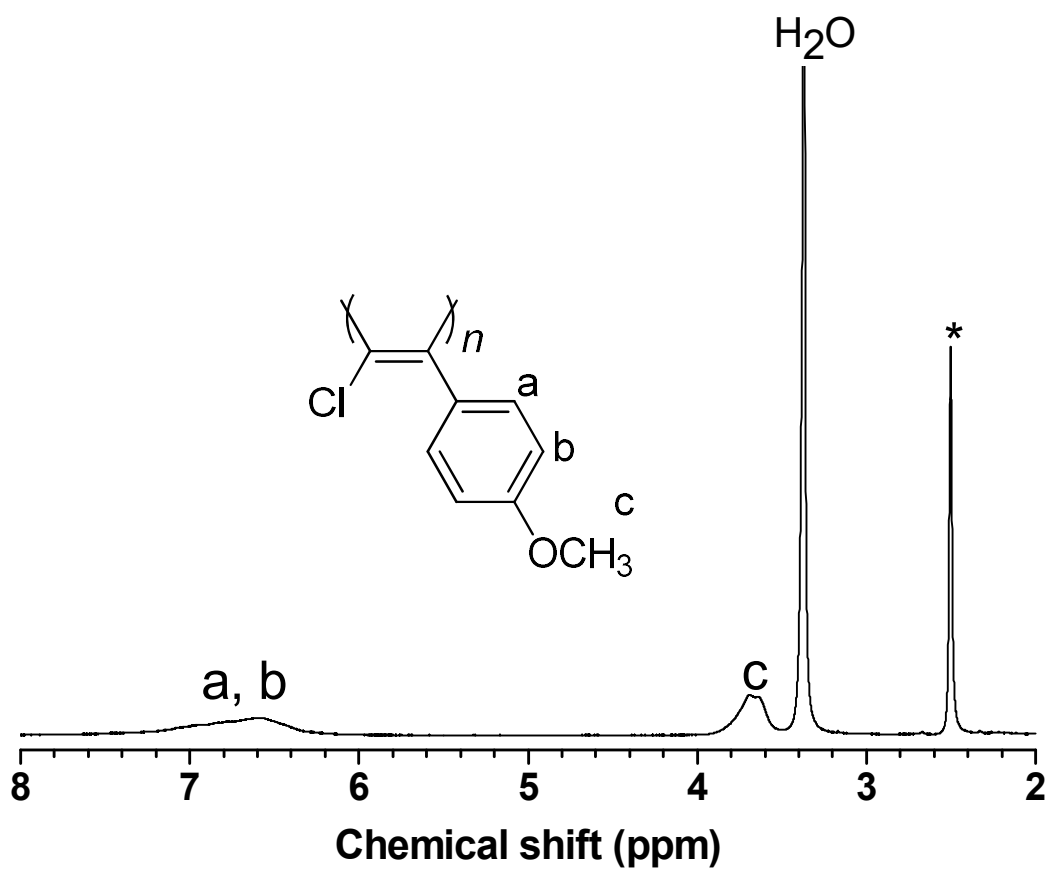

Figure S39.  $^1\text{H}$  NMR spectrum of P4(Ag) in  $\text{DMSO-}d_6$ .

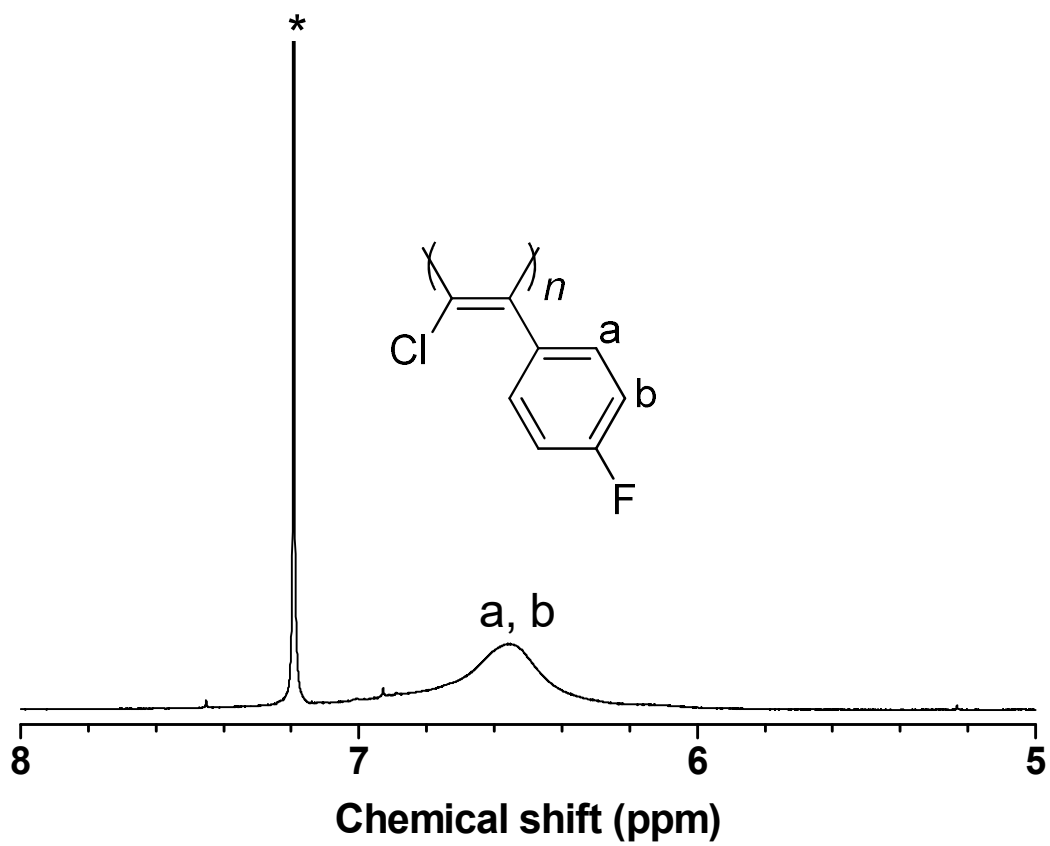

Figure S40.  $^1\text{H}$  NMR spectrum of P5(Ag) in  $\text{CDCl}_3$ .

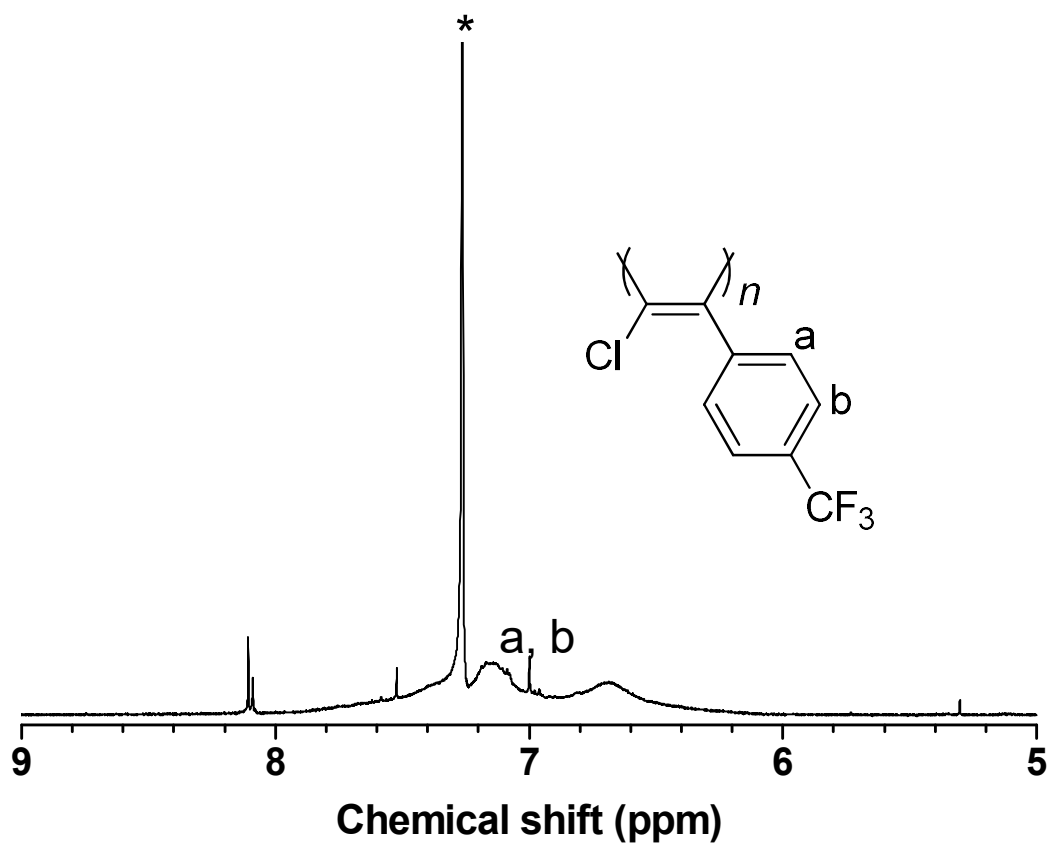

Figure S41.  $^1\text{H}$  NMR spectrum of P6(Ag) in  $\text{CDCl}_3$ .

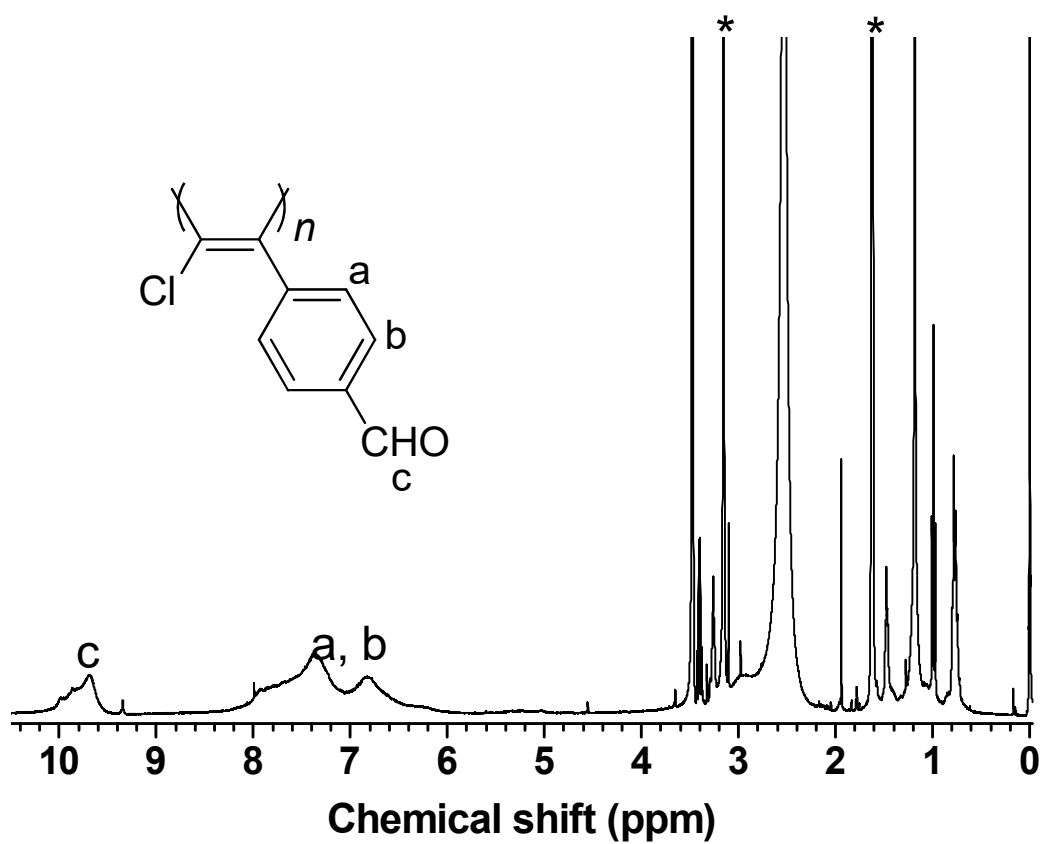

Figure S42.  $^1\text{H}$  NMR spectrum of P8(Ag) in  $(\text{THF-}d_3)$ .



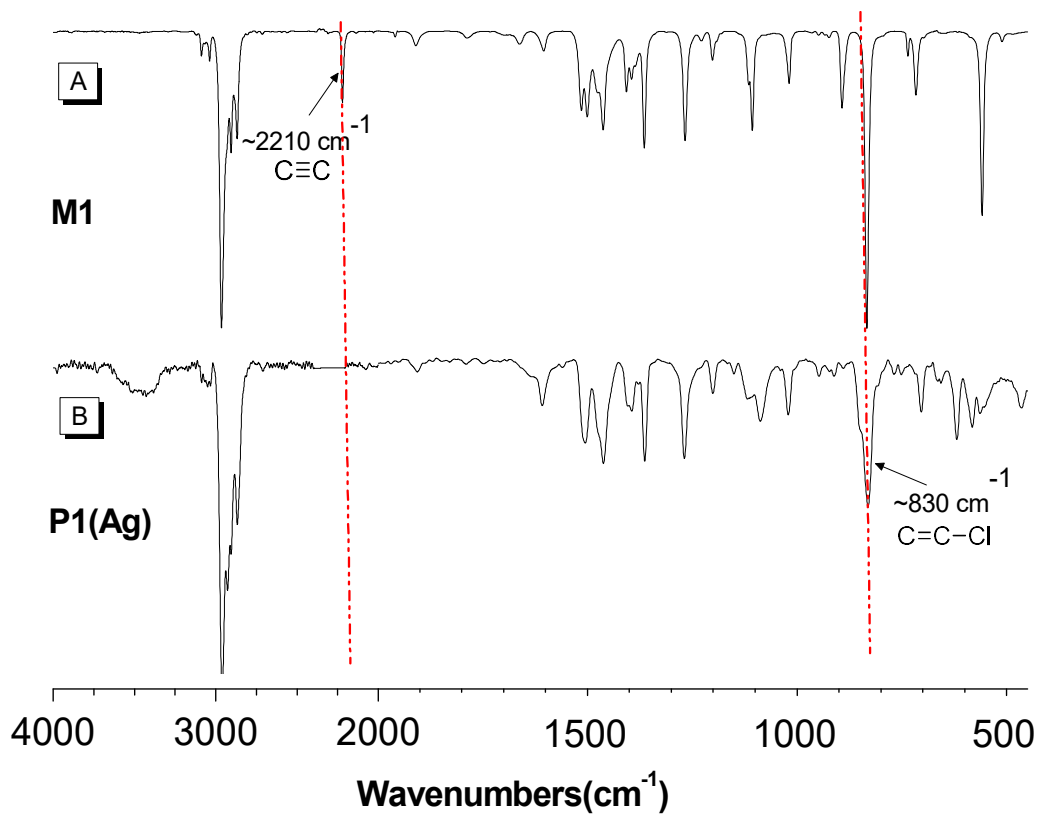

Figure S43. FTIR spectra of (A) M1 and (B) P1(Ag).

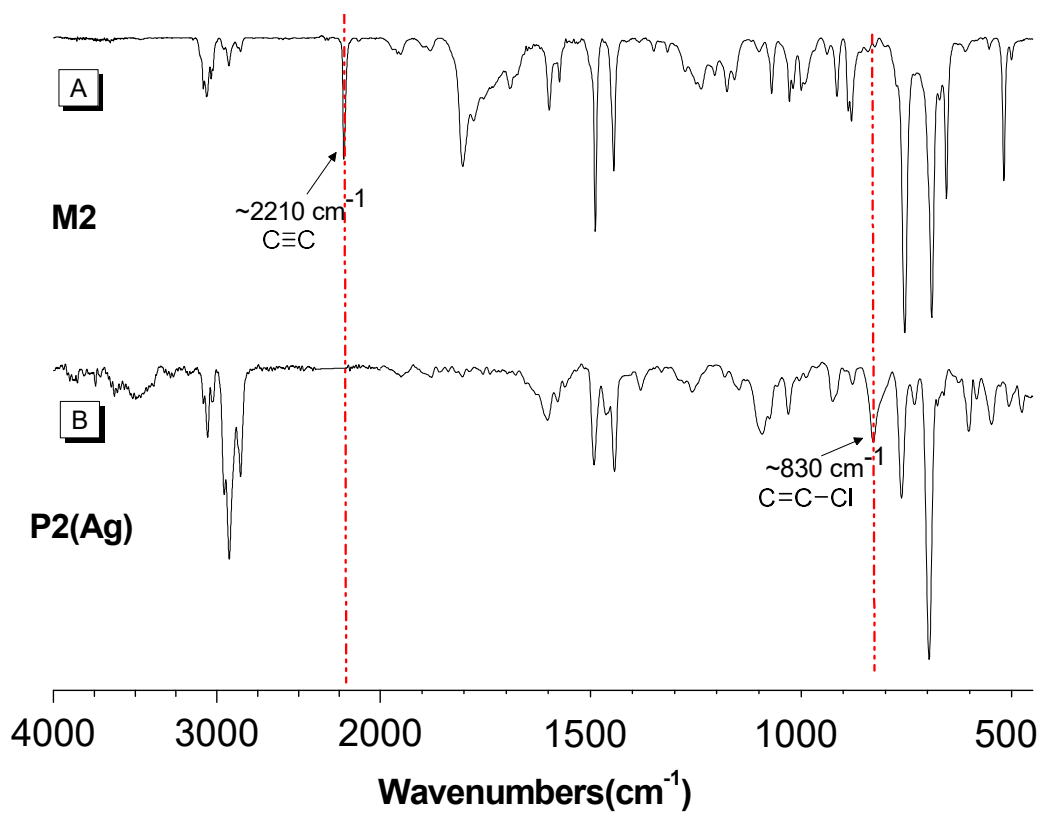

Figure S44. FTIR spectra of (A) M2 and (B) P2(Ag).

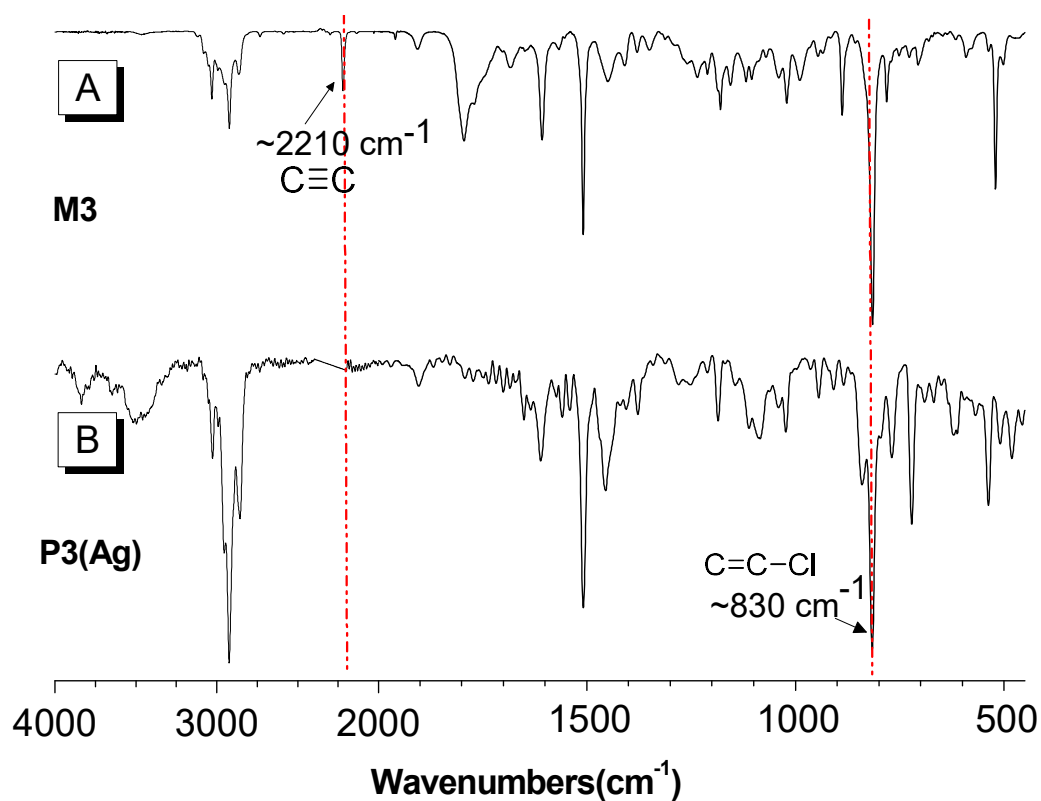

Figure S45. FTIR spectra of (A) M3 and (B) P3(Ag).

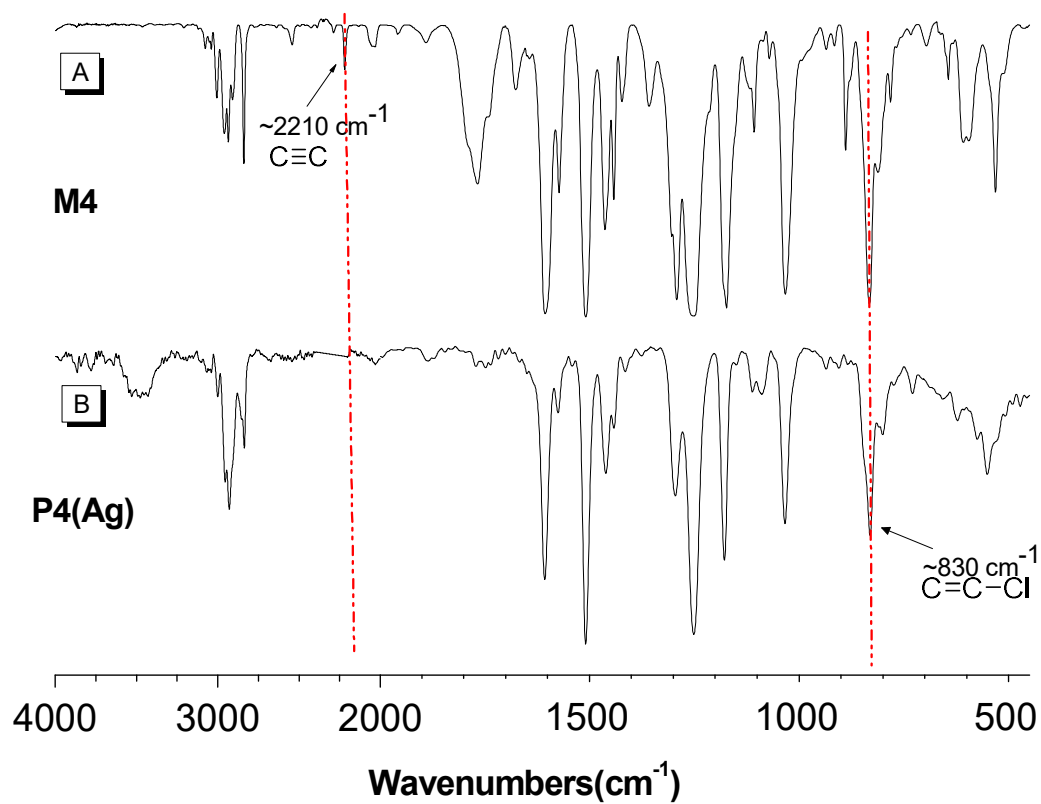

Figure S46. FTIR spectra of (A) M4 and (B) P4(Ag).

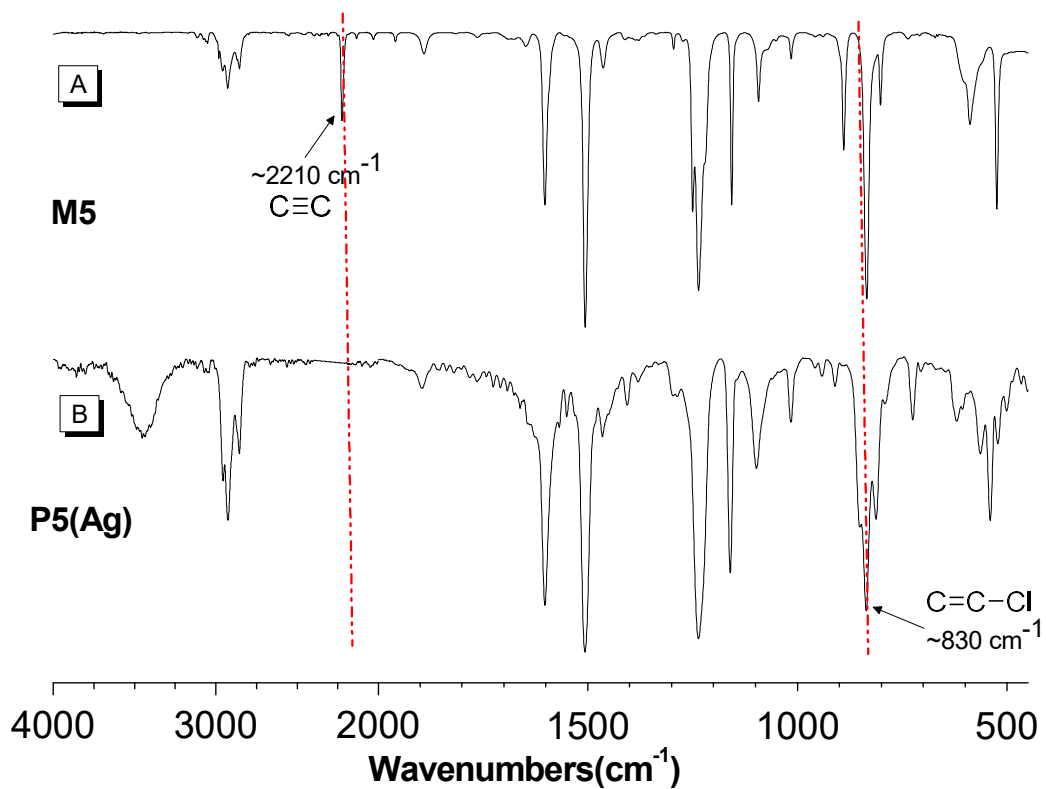

Figure S47. FTIR spectra of (A) M5 and (B) P5(Ag).

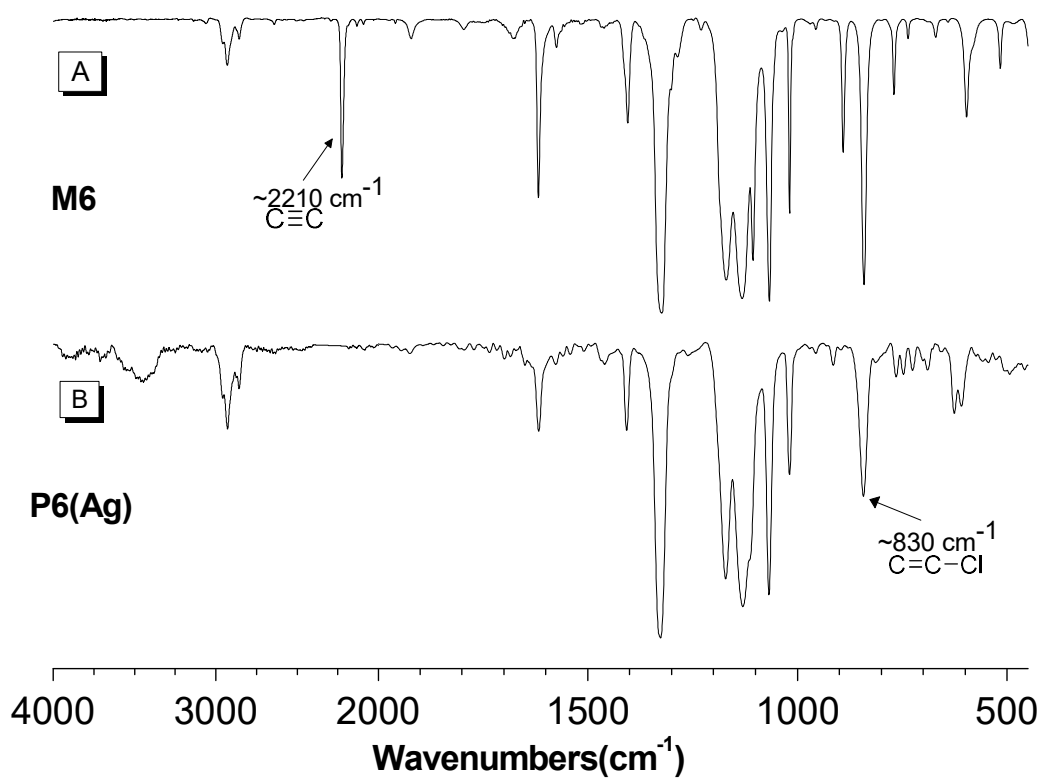

Figure S48. FTIR spectra of (A) M6 and (B) P6(Ag).

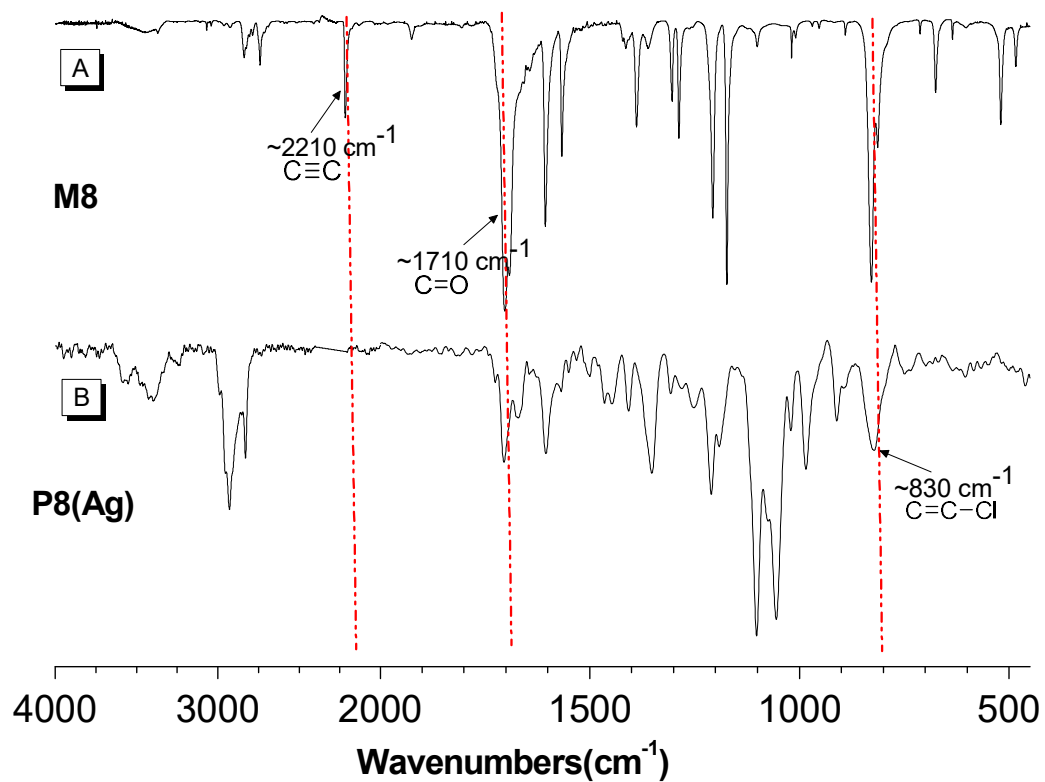

Figure S49. FTIR spectra of (A) M8 and (B) P8(Ag).
